# Supplementary material for: Constraining the volatile evolution of mafic melts at Mt. Somma–Vesuvius, Italy, based on the composition of reheated melt inclusions and their olivine hosts
Source: Copernicus journal article supplement (doi:10.5194/ejm-35-921-2023), 2023-11-09
Supplement: Supplementary file 1 [file TableS1.xlsx]

## Sheet: database MI Vesuvius
	olivine composition* mole%			sample details				MI ptrography before heating experiments					heating experiment observations								Petrography after heating experiments
Olivine ID	Fo core	Fo rim	Fo range sample	Eruption	Age years	style	sample type	MI size µm	MI type	shape	bubble	Notes	Experiment ID	Tq ºC	time exp min	Au Tm ºC	Tmelt	Txl	quenched phase	notes	MI type	shape	bubble	Notes
LFL1_D38_1_3	76	77		Avellino	4.3 Ka	plinian	White pumice	40x50	partially crystallized	sub-ovoidal	1	three small dots outside one MI: decrepitated?	M143	1332	16.2	1058	1065	na	glass+opaque+xl(?)	no changes in the MI was observed up to 971 (no darkening no melt starts)	glass+bubble+2opaques	ovoidal	1	few tiny bubbles outside MI decrepitation(?)
LFL1_D38_1_7				Avellino	4.3 Ka	plinian	White pumice	50	strongly crystallized	spherical	not visibile	severel MI present in the olivine some larger than the one examined. All MI spherical in shape and black	M144	1105	13.03	1059	788	na	glass+several bubble	All MI developed multiple bubbles even though all of them appear to be only melt at quenching	glass+1 large bubble+10 bubbles	spherical	11
LFL1_D38_2_10	87	86		Avellino	4.3 Ka	plinian	White pumice	40x45	partially glassy	ovoidal	1	MI glassy around the visible bubble, but dark for the rest part	M141	1152	15.2	1065	965	716	glass plus bubble		glass+bubble	ovoidal	1
LFL1_D38_2_4	81	76		Avellino	4.3 Ka	plinian	White pumice	40	strongly crystallized	spherical	not visible	several MI are contained in this crystal with different shape and size all dark (strongly crystallized)	M163	1238	16.26	1064	1001	944	glass plus bubble	a large MI (100µm) exploded during experiment	glass+bubble	spherical	1
LFL2_D44_1_1	87	88		Avellino	4.3 Ka	plinian	Grey pumice	70x50	partially crystallized	ovoidal	1	several MI (~7) of different sizes from 40 to 100 µm, from glassy (smaller) to dark (larger); the one considered show an ovoidal shape	M136	1228	20.54	na	1010	800	glass plus bubble	all MI are glassy+bubble after qunching	glass+bubble	subspherical	1	the glass is very wrinkled
LFL2_D44_3_2	85	86		Avellino	4.3 Ka	plinian	Grey pumice	75	strongly crystallized	sub-spherical, faceted	not visibile	some glass is visible at the MI/host interface	M167	1200	15.02	na	821	na	glass plus bubble	the MI was not visible after 1117°C, the quenching was blind	glass+bubble	sub-spherical	1	some small xl may be present
LFL2_D44_4_1		84		Avellino	4.3 Ka	plinian	Grey pumice	75x100	slightly crystallized	ovoidal	1	bubble slightly deformed, mostly glassy with several small opaque(?) crystal	M165	1148	13.01	1067	1022	579	glass plus bubble	at <200°C phase changes in the buble; during quenching the bubble seems two phases	glass+bubble	ovoidal	1	bubble is unusually clear in color
LFL2_D44_5_1				Avellino	4.3 Ka	plinian	Grey pumice	40x60	strongly crystallized	ovoidal	not visibile	other MI were observed in this olivine; all black wid similar shape and size	M166	1221	16.23	1062	939	na	strongly crystallized	gold was on the plate holder; all MI turned black again during quenching	strongly crystallized	ovoidal	na
LFL2_D44_5_4	85	85		Avellino	4.3 Ka	plinian	Grey pumice	100	strongly crystallized	spherical	not visibile		M164	na	na	na	1001	na	na	MI exploded at 1001°C, xl broken. At 864°C decrepitation halo formed around the MI. Xl lost in the stage
LM8_D57_4_4	90	90		Pollena	AD 472	plinian	Pumice	45	strongly crystallized	spherical	not visible		M129	1155	27.3	1068	847	na	glass plus bubble		glass+bubble	spherical	1	Mi is suitable for CO2 original estimation
LM8_D57_4_6		85		Pollena	AD 472	plinian	Pumice	80x60	strongly crystallized	negative crystal shape	not visibile	some glass is visible at the MI/host interface	M158	1237	20.23	na	977	724	brown glass plus bubble		glass+bubbles	negative xl	multiple	one large bubble plus several other smaller bubbles
LM8_D90_1_2		85		Pollena	AD 472	plinian	Pumice	20x15	strongly crystallized	negative crystal shape	not visible	There is another MI (dark and neg.cryst.shape, 50x60 µm)	M138	1272	14.16	1069	1011	na	glass plus bubble	after quenghing glass+bubble+small xl(?); the other MI crystallized during quenching	glass+bubble	sub-ovoidal	1	Another larger MI is not so visible after mounting and cleaning
LM8_D90_1_6	90	90		Pollena	AD 472	plinian	Pumice	20x30	partially crystallized	sub-faceted	1(?)	this inclusion is likely a mixed inclusion	M128	1352	15.17	1056	1107	na	glass+xl+bubble	after experiment and cleaning large (75x40), MI (glass+bubble) negative shape	glass+xltranslucent+buble	negative xl	1	A larger MI is suitable for CO2 original estimation
P1_D49_2_3	86	86		Pompeii	AD 79	plinian	White pumice	75x110	partially crystallized	ovoidal	3	other smaller MI are contained in this olivine, all partially crystallized and with negative xl shape	M159	1139	17.17	1061	998	717	strongly crystallized	smaller MI became black after quenching with the exception of <20µm MI (glass+bubble)	strongly crystallized	ovoidal	na	smaller MI are dark with bubble not visible during exepriments
P1_D49_2_3_bis	86	86		Pompeii	AD 79	plinian	White pumice	75x110	strongly crystallized	ovoidal	not visibile		M160	1260	12.3	na	1055	na	strongly crystallized	smaller MI became black after quenching with the exception of <20µm MI (glass+bubble)	strongly crystallized	ovoidal	na	this is a redo expereiment that showed no substiantial difference from the first experiment
P1_D49_2_5		75		Pompeii	AD 79	plinian	White pumice	70x60	glassy	negative crystal shape	0	other two MI were observed during experiment all behaving similarly	M161	1208	16.16	1067	1048	na	only glass	MI hard to observe especially from 650 to 1000°C, however, another similar M was observed	only glass	negative xl	0	the other MI were quenched to a homogeneous only-glass MI
P1_D49_2_7	88	88		Pompeii	AD 79	plinian	White pumice	115	strongly crystallized	spherical	not visible		M137	1229	19.51	na	1034	na	glass plus bubble	glass brown dark	glass+bubble	spherical	1	Bubble likely two phases, the diameter of the MI is > ~5 µm than the unheated
P1_D50_1_4	72	72		Pompeii	AD 79	plinian	White pumice	65x40	strongly crystallized	negative crystal shape	not visibile	another similar MI was observed	M162	1142	11.59	1063	893	na	only glass	two MI in this crystal are only glass MI	only glass	negative xl	0
P1_D50_1_8	87	86		Pompeii	AD 79	plinian	White pumice	70x50	strongly crystallized	ovoidal	not visible	several dark MI, from 30 to 200 µm in diameter showing negative xl shape. On one sector of oli MI dark-black on another sector MI partially glassy	M139	1218	15.14	na	1022	822	glass plus bubble	the Txl is from a partially glassy MI in the same oli	glass+bubble	ovoidal	1	two phases in the bubble clearly visible (CO2?); one other MI show decrepitation halo (maybe optics effect); another spherical 30 µm-MI is glass+bubble
P1_D50_2_1	76	76		Pompeii	AD 79	plinian	White pumice	35	strongly crystallized	spherical	not visible	other MIs suitable, all dark one larger but not visible during the experiment	M142	1190	16.01	na	686	na	only glass	larger MI show 1 or 2 bubbles	only glass	subspherical	0	the only glass MI is small a larger MI show two bubbles
P1_D50_2_5	85	84		Pompeii	AD 79	plinian	White pumice	55	partially glassy	sub-spherical	not visible		M140	1225	17.45	1063	1031	693	glass plus bubble	at 1120 two bubble of the same size do not become one; at1184 one bubble (2 phases?)	glass+large bubble	spherical	1	glass is wrinkled; bubble two phases
P2_D53_2_5	88	87		Pompeii	AD 79	plinian	Grey Pumice	60x50	partially glassy	ovoidal	1	bubble shows irregualr shape (non-spherical)	M135	1180	17.12	na	990	703	glass plus bubble	glass+bubble after qunching	glass+bubble	ovoidal	1	two phases in the bubble clearly visible (CO2?)
P2_D53_3_5	90	89		Pompeii	AD 79	plinian	Grey Pumice	55x60	partially glassy	sub-spherical	visible	this inclusion is likely a mixed inclusion, irregular bubble shape (non-spherical)	M134	1272	22.27	1067	969	724	solid plus melt	The MI never became completely dark; 1070 solid phase ghange transparent mineral(?)	partially glassy	sub-spherical	na	it is hard to identify the MI
P2_D53_3_6	90	90		Pompeii	AD 79	plinian	Grey Pumice	60x45	strongly crystallized	ovoidal	not visible	some translucent xl at the MI/host interface	M130	1171	16.27	1065	1065	na	glass plus bubble	1160, MI decripitated small bubbles visibile on the outer of the MI; bubble seem two phases	glass+bubble	ovoidal	1	Large bubble (for decrepitation?)
P2_D53_4_1	90	90		Pompeii	AD 79	plinian	Grey Pumice	40x25	glass+bubble	ovoidal	1		M130a	1160	12.27	na	1076	643	glass plus bubble		glass+bubble	ovoidal	1	another small MI is glass+bubble
P2_D53_4_2	90	90		Pompeii	AD 79	plinian	Grey Pumice	45	strongly crystallized	ovoidal	not visible	some translucent phase at the MI/host interface	M131		9.49	na	938	790	na	Lost during unloading from the stage	na	na	na
P2_D53_4_4	90	90		Pompeii	AD 79	plinian	Grey Pumice	40x65	strongly crystallized	ovoidal	not visible	some translucent phase at the MI/host interface; other MI suitable: small MI glassy, large MI dark	M132	1143	21.07	1065	815	686	glass plus bubble		glass+bubble	ovoidal	1	wrinkled glass; bubble containing 2 phases (CO2 liquid plus vapor?)
P2_D53_5_6	90	87		Pompeii	AD 79	plinian	Grey Pumice	45x60	partially glassy	ovoidal	1	The MI was reheated up to 1292°C when the bubble was completely dissolved and only melt was present; after quenching the MI was again dark	M133	1177	18.33	1067	1023	678	strongly crystallized	the experiment was repeated with tow negative quenching to glass	strongly crystallized	ovoidal	na
R6_D54_4_1	86	86		Ren. Erupt.	AD 1631	plinian	pumice	65	strongly crystallized	sub-spherical, faceted	1	the MI is dark but glass around the bubble is visible,	M155	1183	15.01	1062	1064	684	na	MI exploded during experiment ; the olivine broke apart and was not possible to find them	na	na	na
R6_D54_4_2	86	86		Ren. Erupt.	AD 1631	plinian	pumice	150	strongly crystallized	spherical	not visibile	the MI is extremely large	M156	1154	15.13	na	1082	na	glass plus bubble	the quenched glass appear brownish	glass+bubble	spherical	1	likely small oxides are present
R6_D54_4_5	86	86		Ren. Erupt.	AD 1631	plinian	pumice	50	slightly crystallized	sub-spherical	1		M157	1243	17.33	1066	1039	560	strongly crystallized	after MI was only melt the quenching resulted in a dark black object	strongly crystallized	negative xl	na
SCL12_D7_3_3			71-73	na	> 35.0 ka	effusive	lava	80x65	strongly crystallized	ovoidal	not visible		M000	1197	17.2	1050	1080	na	glass plus bubble		glass+bubble	ovoidal	1	bubble very small
SCL12_D7_3_9	71	71	71-73	na	> 35.0 ka	effusive	lava	50	partially crystallized	subspherical	visible	several smaller inclusions are glassy, some with decrepitation halo	M147	1202	21.4		1072	996	leaked	smaller MI are glassy	na	na	na	smaller MI are suitable for major element analysis, some larger MI show decrepitation halo
SCL12_D7_5_5	71	71	71-73	na	> 35.0 ka	effusive	lava	60	strongly crystallized	spherical	not visibile	several other smaller inclusions are partially crystallized (glass visible)	M148	1168	21.08	1070	1073	na	leaked	Mi exploded during heating, other smaller MI were quenched when only melt was present	leaked	na	na	a smaller MI (25 µm) is glass+bubble
SCL12_D7_6_11		71	71-73	na	> 35.0 ka	effusive	lava	60x40	partially crystallized	negative crystal shape	visible		M149	1173	25.4	1059	1092	na	apt+glass+opaque+bubble	It took ~7 minutes to get online regime. Lost during cleaning?	na	na	na
SCL12_D7_7_1			71-73	na	> 35.0 ka	effusive	lava	50	partially crystallized	negative crystal shape	not visibile	mixed inclusion?	M150	1213	15.14	1061	975	829	apt+deformed bubble+glass		glass+apt+bubble	sub-ovoidal	1	the bubble is deformed, there should be enough glass for analysis
SCL12_D7_8_4			71-73	na	> 35.0 ka	effusive	lava	60x45	partially crystallized	negative crystal shape	visible	mixed inclusion? Another smaller MI showing the same features of the one reported is obeserved	M151	1160	19.07	1060	985	952	xl+bubble+glass	the other MI glass plus bubble	glass+xltranslucent+buble	sub-ovoidal	1
SCL14_D90_3_1				na	> 35.0 ka	effusive	lava	60x90	strongly crystallized	negative crystal shape	not visibile	other Mi are visible. Most of them are larger black and negative crystal shape	M152	1167	13.3	na	973	na	glass plus bubble	another larger MI exploded when the melt started	glass+bubble	negative xl	1	the inclusion show some ≤1-µm dots at interface (bubbles or xl?)
SCL14_D90_3_2				na	> 35.0 ka	effusive	lava	50	strongly crystallized	spherical	not visibile		M153	1244	22.22	1067	1016	na	glass plus bubble	the quenched MI show a bubble arger than the usual	na	na	na	lost during mounting
SCL14_D90_5_3	69	69		na	> 35.0 ka	effusive	lava	50	slightly crystallized	sub-spherical	1	olivine is highly fracturated the visibility is hampered by fractures and abundance of inclusions	M154	1198	18.03	1073	na	na	bad visibility	several inclusions exploded at the surface hampering the microthermometric observation	glass+bubble+opaque	ovoidal	1	after cleaning 4 MI are suitable for analysis, one small MI is glass+bubble, the larger shows glass+bubble+xl
SCL14_D90_5_4	71	70		na	> 35.0 ka	effusive	lava	55x80	partially crystallized	ovoidal	1	bubble of MI deformed	M155a	1272	17.04	1062	1072	na	glass+apt+bubble	the inclusion was amixed inclusion, bubble is large	glass+apt+bubble	ovoidal	1
SCL14_D90_5_9	69	70		na	> 35.0 Ka	effusive	lava	45x80	partially crystallized	negative crystal shape	not visibile	transparent phase visible but mostly dark	M146	1223	18.28	1061	979	na	glass+apatite	likely a mixed inclusion	Apt+glass+bubbles	negative xl	1	there should be enough room to analyze the glass
SCL14_D90_6_2	72	71		na	> 35.0 Ka	effusive	lava	50x40	partially crystallized	sub-ovoidal	not visibile	apatite visibile in the MI	M145	1240	16.35	1052	na	724	apt+glass+xls/bubbles	the gold flake was on the olivine-holder plate, the olvine was melting at the edge at Tq	Apt+glass+bubbles	sub-ovoidal	4	Most part of the inclusion is apatite
*Based on Redi (2014; PhD Thesis)
