# Supplementary material for: Constraining the volatile evolution of mafic melts at Mt. Somma–Vesuvius, Italy, based on the composition of reheated melt inclusions and their olivine hosts
Source: Copernicus journal article supplement (doi:10.5194/ejm-35-921-2023), 2023-11-09
Supplement: Supplementary file 2 [file Supplementary_Tablesheaders_rev2Sept_2023.pdf › Supplementary_Tablesheaders_rev2Sept_2023.pdf]

## Supplementary Table list

*Supplementary Table S1.* Table with description of MI before and after heating experiments.

5 *Supplementary Table S2.* First worksheet named “*OlivineMI\_full\_data\_corrthisstu*” is a table containing: (1) general information on the samples from each individual MI hosted in olivine was selected (columns B to H), (2) composition of the major elements as single or average raw data (columns I to V), (3) major element compositions normalized to 100% on an anhydrous basis (columns W to AJ), (4) EMP analysis of olivine hosts normalized to 100% (columns AK to AS), (5) SIMS analysis of glass of MI (columns AT to AY), (6) Composition of glass of MI after PEC and Fe-loss correction (columns AZ to BN), (7) general information of MI (columns BO to BQ), (8) volatile concentrations restored (columns BR to BV), and (9) estimated pressures (depths) and fluid composition based on MafiCH (columns BW to BZ). The second spreadsheet named “*EMP raw data*” contains EMP raw data for individual MI (some of which were  
10 analyzed more than one time) and individual host..

*Supplementary Table S3.* The first spreadsheet “*Glass standards SIMS*” represents glass references used for SIMS analysis of the MI of this study. The volatile compositions of the glass references used in this study are compared with those of the literature. The second spreadsheet “*Glass Standards raw analysis*” contains the raw data of the glass references used for this study. Finally, the third spreadsheet “*Melt Inclusion raw analysis*” contains raw data of the glass of MI reported in this study.

15 *Supplementary Table S4.* Prediction of the CO<sub>2</sub> contents of the bubble of MI using the software MIMiC (Rasmussen et al., 2020).

*Supplementary Table S5.* H<sub>2</sub>O-CO<sub>2</sub> restored compositions of MI of this study and the estimated pressures of formation based on MafiCH model (Allison et al. 2022). In addition, in a separate worksheet “*H-diffusive experiments*”, we reported the parameters used to calculate the degree of reequilibration of MI for their H<sub>2</sub>O contents during heating experiments. See the text for details about the method used to correct the MI for H-loss during heating experiments.

20 *Supplementary Table S6.* Petrolog3 predictions based on the MI SCL14-D92-3-1 as starting composition. The H<sub>2</sub>O was marked as saturated for the calculation.

25
