# Supplementary material for: Constraining the volatile evolution of mafic melts at Mt. Somma–Vesuvius, Italy, based on the composition of reheated melt inclusions and their olivine hosts
Source: Copernicus journal article supplement (doi:10.5194/ejm-35-921-2023), 2023-11-09
Supplement: Supplementary file 2 [file TableS2.xlsx]

## Sheet: OlivineMI_full_data_corrthisstu
	General sample information								EMP analysis of glass of MI normalized to 100% (wt%)														EMP analysis of olivine hosts normalized to 100% (wt%)									SIMS analysis of glass of MI						Composition of glass of MI after PEC and Fe-loss correction wt%
MI ID	AGE (years)	LITHOTYPE	ERUPTION STYLE	ERUPTION NAME	host	Tq °C	Tm °C	Type of MI	SiO2	TiO2	Al2O3	Cr2O3	FeO	MnO	MgO	CaO	Na2O	K2O	P2O5	Cl	SO3	Total	Host Mg#	Cr2O3	MgO	CaO	MnO	SiO2	Al2O3	FeO	NiO	CO2 ppm	H2O wt%	F ppm	S ppm	Cl ppm	Al2O3 wt%	SiO2	TiO2	Al2O3	Fe2O3	FeO	MnO	MgO	CaO	Na2O	K2O	P2O5	Cr2O3
LFL2_D44_3_2_average	4365	grey pumice	plinian	Avellino	oli	1200	821	bubble-bearing MI	48.46	0.88	15.03	0	8.47	0.17	10	9.37	1.68	4.32	0.73	0.39	0.51	100.01	85.38	0	45.69	0.22	0.22	39.76	0.03	13.95	0.14	1553	3.58	3292	2178	4403	17.02	49.713	0.978	16.667	1.484	6.651	0.187	6.454	10.389	1.869	4.793	0.814	0
LFL1_D38_2_10_M1_average	4365	white pumice	plinian	Avellino	oli	1152	965	bubble-bearing MI	49.18	0.94	15.34	0.01	8.04	0.16	8.13	9.97	1.93	4.63	0.79	0.43	0.47	100.02	87.11	0	46.97	0.22	0.23	40.02	0.03	12.39	0.15							49.747	0.968	15.792	1.516	6.624	0.165	7.348	10.264	1.987	4.766	0.813	0.01
LFL1_D38_2_10_M2	4365	white pumice	plinian	Avellino	oli			bubble-bearing MI	49.14	1.02	15.42	0.05	8.23	0.17	7.43	10.62	1.77	4.42	0.78	0.42	0.54	100.01	87.26	0.03	47.02	0.22	0.19	40.11	0.06	12.24	0.14							49.624	1.027	15.593	1.474	6.683	0.168	7.585	10.743	1.794	4.47	0.785	0.055
LFL2_D44_4_1_average	4365	grey pumice	plinian	Avellino	oli	1148	1022	bubble-bearing MI	47.03	0.9	16.03	0.02	8.83	0.14	8.45	10.97	1.49	4.37	0.89	0.36	0.51	99.99	84.96	0	45.49	0.24	0.24	39.6	0.02	14.36	0.04							48.016	0.973	17.328	1.468	6.665	0.151	6.222	11.858	1.611	4.724	0.962	0.022
LFL2_D44_1_1_average	4365	grey pumice	plinian	Avellino	oli	1148	1010	bubble-bearing MI	49.8	0.86	14.37	0.03	7.58	0.15	10.54	8.89	1.73	4.47	0.76	0.4	0.42	100	87.97	0.03	47.55	0.22	0.21	40.16	0.06	11.6	0.17	1615	3.28	2392	1946	4233	17.07	50.563	0.914	15.268	1.492	6.651	0.159	8.082	9.445	1.838	4.749	0.807	0.032
P2_D53_4_4	79 A.D.	grey pumice	plinian	Pompeii	oli	1143	815	bubble-bearing MI	48.62	1.01	11.17	0.07	7.82	0.14	8.8	12.39	1.92	5.48	1.13	0.49	0.95	99.99	89.63	0.03	48.97	0.29	0.18	40.53	0.03	10.1	0.23	3170	3.9	5455	4599	5383	15.45	49.267	1.028	11.369	1.892	6.296	0.142	8.642	12.611	1.954	5.578	1.15	0.071
P1_D50_2_1_average	79 A.D.	white pumice	plinian	Pompeii	oli	1190	686	bubbe-free MI	50.97	1.27	17.08	0.01	7.55	0.11	5.15	6.82	2.96	6.74	1.06	0.24	0.05	100.01	76.11	0.01	39.12	0.33	0.45	38.05	0.06	21.9	0.08	83	0.16	3537	175	2377	17.01	51.506	1.336	17.968	2.146	5.627	0.116	2.796	7.175	3.114	7.091	1.115	0.011
P1_D49_2_5_average	79 A.D.	white pumice	plinian	Pompeii	oli	1208	1048	bubbe-free MI	50.94	1.16	17.02	0.03	8.35	0.13	4.63	6.3	2.93	7.07	1.2	0.18	0.05	99.99	75.6	0.01	38.84	0.32	0.42	37.9	0.08	22.35	0.07	90	0.14	3717	156	1970	19.08	51.833	1.238	18.159	2.093	5.31	0.139	2.526	6.722	3.126	7.543	1.28	0.032
P1_D50_1_4_average	79 A.D.	white pumice	plinian	Pompeii	oli	1142	893	bubbe-free MI	51.69	1.19	18.39	0	7.42	0.14	3.33	5.44	3.34	7.56	1.15	0.29	0.06	100	73.25	0	37.2	0.29	0.47	37.64	0.07	24.22	0.1	170	0.44	4122	247	2692	19.11	52.239	1.235	19.084	2.109	5.027	0.145	2.012	5.645	3.466	7.845	1.193	0
P1_D49_2_7_average	79 A.D.	white pumice	plinian	Pompeii	oli	1229	1034	bubble-bearing MI	48.66	1.03	12.85	0.01	7.69	0.11	11.29	9.37	1.87	5.42	0.87	0.4	0.43	100	88.28	0	47.89	0.28	0.21	40.07	0.04	11.33	0.18	2215	3.81	3743	2132	4751	15.72	49.622	1.128	14.074	1.76	6.405	0.12	7.68	10.263	2.048	5.936	0.953	0.011
P1_D50_1_8_M1_average	79 A.D.	white pumice	plinian	Pompeii	oli	1210	1022	bubble-bearing MI	46.98	1.04	14.11	0.04	8.8	0.17	10.08	9.37	1.99	5.34	0.96	0.43	0.69	100	86.06	0	46.16	0.26	0.23	39.89	0	13.33	0.12	2042	3.39	3852	3012	4381		48.355	1.173	15.92	1.791	6.376	0.192	6.221	10.572	2.245	6.025	1.083	0.045
P1_D50_1_8_M6_average	79 A.D.	white pumice	plinian	Pompeii	oli	1210	1022	bubble-bearing MI	47.14	1.1	13.86	0.01	8.81	0.16	10.05	9.71	1.84	5.15	1	0.46	0.71	100	86.08	0	46.17	0.25	0.22	39.92	0	13.31	0.12	2376	3.63	3816	3155	4774	16.26	48.543	1.238	15.596	1.754	6.415	0.18	6.347	10.926	2.07	5.795	1.125	0.011
P2_D53_3_6_average	79 A.D.	grey pumice	plinian	Pompeii	oli	1171	1065	bubble-bearing MI	49.81	0.98	11.18	0.04	7.79	0.14	9.52	11.64	2.05	5.1	0.9	0.35	0.49	99.99	89.96	0.06	49.01	0.27	0.16	40.49	0.05	9.76	0.2							50.193	0.995	11.351	1.838	6.337	0.142	9.112	11.818	2.081	5.178	0.914	0.041
P2_D53_4_1	79 A.D.	grey pumice	plinian	Pompeii	oli	1160	1076	bubble-bearing MI	48.53	1.11	11.36	0.12	7.66	0.13	7.24	14.03	1.57	5.86	1.13	0.62	0.65	100.01	89.93	0.03	49.04	0.26	0.17	40.47	0.02	9.79	0.23	5113	4.5	5706	3077	6220	17.02	48.682	1.076	11.011	1.889	6.309	0.126	8.896	13.598	1.522	5.68	1.095	0.116
LM8_D57_4_4_average	472	Pumice	plinian	Pollena	oli	1155	847	bubble-bearing MI	49.02	1.23	12.74	0.05	7.89	0.17	8	12.34	1.49	5.43	0.74	0.3	0.61	100.01	90.09	0.02	49.01	0.27	0.17	40.66	0.04	9.61	0.22	2594	3.1	3191	2070	2739	16.44	49.106	1.199	12.424	1.716	6.461	0.166	9.374	12.034	1.453	5.295	0.722	0.049
R6_D54_4_2_average	1631 A.D.	pumice	plinian	AD 1631	oli	1154	1082	bubble-bearing MI	47.68	1.13	15.9	0.04	7.91	0.11	7.81	9.84	2.16	5.38	1.01	0.53	0.51	100.01	86.16	0.01	46.44	0.25	0.24	39.54	0.03	13.3	0.18	2279	3.65	3040	2566	6014	16.91	48.334	1.179	16.593	1.685	6.471	0.115	6.389	10.269	2.254	5.615	1.054	0.042
SCL12_7_1_average	>33000	lava	effusive	Somma caldera	oli	1213	975	bubbe-free MI	52.44	1.18	17.82	0.01	6.48	0.1	4.29	5.35	3.51	8.09	0.51	0.2	0.03	100.01	71.53	0.02	36.04	0.31	0.45	37.48	0.07	25.57	0.07	358	0.2	8104	163	3264	20.24	53.224	1.256	18.971	2.07	4.268	0.106	1.506	5.696	3.737	8.612	0.543	0.011
SCL14_D49_5_3_M1_average	>33000	lava	effusive	Somma caldera	oli	1198		bubbe-free MI	53.89	1.07	18.71	0	5.98	0.1	3.15	3.84	3.2	9.26	0.49	0.27	0.04	100	69.5	0.01	34.7	0.27	0.52	37.25	0.06	27.16	0.04	85	0.07	3403	188	2640	18.99	54.389	1.111	19.42	2.003	4.284	0.104	1.263	3.986	3.321	9.611	0.509	0
SCL14_D49_5_3_M2_average	>33000	lava	effusive	Somma caldera	oli	1198		bubbe-free MI	51.88	1.18	17.5	0	7.53	0.14	4.34	4.51	3.17	8.57	0.83	0.32	0.04	100.01	69.5	0.01	34.7	0.27	0.52	37.25	0.06	27.16	0.04	73	0.06	3427	330	3415	17.22	53.316	1.296	19.222	2.089	3.943	0.154	1.22	4.954	3.482	9.413	0.912	0
SCL14_D92_3_1_average	>33000	lava	effusive	Somma caldera	oli	1167	973	bubble-bearing MI	47.44	1.15	15.85	0.05	7.82	0.15	8.32	9.82	2.11	5.3	0.97	0.52	0.5	100	86.38	0.01	46.42	0.28	0.26	39.81	0.02	13.04	0.16	2319	3.15	2821	2245	5078	17.45	48.108	1.209	16.658	1.674	6.493	0.158	6.52	10.32	2.218	5.57	1.019	0.053
SCL12_3_3_MS_average	>33000	lava	effusive	Somma caldera	oli	1197	1080	bubbe-free MI	51.89	1.31	17.92	0.02	7.09	0.09	4.21	5.68	3.38	7.05	1.06	0.27	0.03	100	71.19	0.06	35.79	0.31	0.49	37.44	0.05	25.82	0.05	43	0.18	3750	172	2536		52.827	1.401	19.166	1.965	4.508	0.096	1.651	6.075	3.615	7.54	1.134	0.021
SCL14_D49_5_4_M1_average	>33000	lava	effusive	Pompeii	oli	1272	1072	bubbe-free MI	53.64	1.03	17.49	0	6.11	0.08	4.2	4.65	3.06	9.02	0.44	0.24	0.04	100	70.84	0.02	35.71	0.27	0.49	37.27	0.02	26.21	0.01	57	0.06	4367	184	2255	17.82	54.381	1.09	18.513	2.05	4.286	0.085	1.421	4.922	3.239	9.548	0.466	0
SCL14_6_2_average	>33000	lava	effusive	Somma caldera	oli	1240		bubbe-free MI	53.08	1.06	16.83	0	7.68	0.15	4.91	4.15	2.98	8.07	0.7	0.32	0.08	100.01	69.73	0	34.89	0.31	0.51	37.19	0.05	27	0.06							54.768	1.175	18.655	1.937	4.308	0.166	1.367	4.6	3.303	8.945	0.776	0
SCL14_5_9_average	>33000	lava	effusive	Somma caldera	oli	1223	979	bubbe-free MI	53.48	1.61	16.01	0	6.61	0.14	4.97	5.25	2.87	7.73	0.96	0.33	0.03	99.99	69.57	0.01	34.71	0.31	0.53	37.29	0.05	27.07	0.04							54.885	1.764	17.54	1.964	3.945	0.153	1.331	5.752	3.144	8.469	1.052	0
[truncated: 3 more columns]

## Sheet: EMP raw data
	Raw analysis of glass of MI based on EMP (wt%)														Raw analysis of olivine hosts in wt% using EMP										Raw analysis of olivine hosts in cation fractions based on 24 Oxygen using EMP
Mass%	SiO2	TiO2	Al2O3	Cr2O3	FeO	MnO	MgO	CaO	Na2O	K2O	P2O5	Cl	SO3	Total		Cr2O3	MgO	CaO	MnO	SiO2	Al2O3	FeO	NiO	Total		Cr	Mg	Ca	Mn	Si	Al	Fe	Ni	Total	Comment
LFL2_D44_3_2_1	46.575	0.909	14.297	0	8.228	0.205	9.568	8.96	1.596	4.167	0.663	0.385	0.456	95.922	LFL2_D44_3_2_ol1	0	46.229	0.227	0.225	40.257	0.018	14.027	0.145	101.128	LFL2_D44_3_2_ol1	0	10.2257	0.036	0.0283	5.9736	0.0032	1.7407	0.0173	18.0249	LFL2_D44_3_2_ol1
LFL2_D44_3_2_2	46.487	0.778	14.561	0	8.038	0.125	9.645	9.035	1.639	4.123	0.744	0.354	0.518	95.967	LFL2_D44_3_2_ol2	0	45.547	0.223	0.208	39.615	0.036	13.999	0.127	99.755	LFL2_D44_3_2_ol2	0	10.2218	0.036	0.0265	5.964	0.0063	1.7626	0.0154	18.0326	LFL2_D44_3_2_ol2
LFL2_D44_3_2_average	46.531	0.8435	14.429	0	8.133	0.165	9.6065	8.9975	1.6175	4.145	0.7035	0.3695	0.487	95.9445	LFL2_D44_3_2_ol_average	0	45.888	0.225	0.2165	39.936	0.027	14.013	0.136	100.441	LFL2_D44_3_2_ol_average	0	10.2237	0.036	0.0274	5.9688	0.00475	1.75165	0.01635	18.0287	LFL2_D44_3_2_ol_average
LFL1_D38_2_10_M1_1	46.656	0.934	14.646	0	7.673	0.174	7.648	9.455	1.816	4.366	0.752	0.408	0.442	94.878	LFL1_D38_2_10_M1_ol1	0	48.272	0.228	0.248	40.967	0.012	12.727	0.157	102.611	LFL1_D38_2_10_M1_ol1	0	10.458	0.0356	0.0305	5.9539	0.002	1.547	0.0183	18.0454	LFL1_D38_2_10_M1_ol1
LFL1_D38_2_10_M1_2	46.66	0.842	14.454	0.026	7.577	0.128	7.768	9.453	1.846	4.417	0.74	0.405	0.448	94.673	LFL1_D38_2_10_M1_ol2	0	47.449	0.226	0.21	40.591	0.043	12.529	0.148	101.196	LFL1_D38_2_10_M1_ol2	0	10.414	0.0357	0.0262	5.9763	0.0075	1.5427	0.0175	18.0199	LFL1_D38_2_10_M1_ol2
LFL1_D38_2_10_M1_average	46.658	0.888	14.55	0.013	7.625	0.151	7.708	9.454	1.831	4.3915	0.746	0.4065	0.445	94.7755	LFL1_D38_2_10_M1_olaverage	0	47.8605	0.227	0.229	40.779	0.0275	12.628	0.1525	101.904	LFL1_D38_2_10_M1_olaverage	0	10.436	0.03565	0.02835	5.9651	0.00475	1.54485	0.0179	18.0327	LFL1_D38_2_10_M2_olaverage
LFL1_D38_2_10_M2	46.445	0.959	14.571	0.051	7.776	0.157	7.023	10.039	1.677	4.177	0.733	0.393	0.507	94.419	LFL1_D38_2_10_M2_ol3bis	0	47.997	0.211	0.196	40.841	0.039	12.62	0.157	102.061	LFL1_D38_2_10_M2_ol3bis	0	10.4468	0.033	0.0243	5.9632	0.0067	1.541	0.0185	18.0336	LFL1_D38_2_10_M2_ol3bis
															LFL1_D38_2_10_M2_ol4	0.065	47.815	0.242	0.185	40.879	0.074	12.311	0.126	101.697	LFL1_D38_2_10_M2_ol4	0.0076	10.4273	0.0379	0.0229	5.9802	0.0127	1.5062	0.0148	18.0096	LFL1_D38_2_10_M2_ol4
															LFL1_D38_2_10_M2_ol_average	0.0325	47.906	0.2265	0.1905	40.86	0.0565	12.4655	0.1415	101.879	LFL1_D38_2_10_M2_ol_average	0.0038	10.437	0.03545	0.0236	5.9717	0.0097	1.5236	0.01665	18.0216	LFL1_D38_2_10_M2_ol_average
LFL2_D44_4_1_1	44.239	0.82	15.061	0	8.301	0.143	7.999	10.221	1.372	4.12	0.856	0.338	0.48	93.874	LFL2_D44_4_1_ol2	0.002	45.455	0.245	0.239	39.667	0	14.63	0.08	100.318	LFL2_D44_4_1_ol2	0.0002	10.1729	0.0393	0.0304	5.9552	0	1.8369	0.0096	18.0446	LFL2_D44_4_1_ol2
LFL2_D44_4_1_2	44.449	0.842	14.98	0.01	8.224	0.112	7.909	10.557	1.394	4.176	0.79	0.338	0.418	94.123	LFL2_D44_4_1_ol1bis	0	46.412	0.249	0.249	40.29	0.045	14.368	0.001	101.614	LFL2_D44_4_1_ol1bis	0	10.2284	0.0394	0.0312	5.9564	0.0078	1.7765	0.0001	18.0399	LFL2_D44_4_1_ol1bis
LFL2_D44_4_1_3	44.26	0.871	15.273	0.051	8.438	0.146	7.98	10.235	1.452	4.053	0.864	0.351	0.541	94.436	LFL2_D44_4_1_ol_average	0.001	45.9335	0.247	0.244	39.9785	0.0225	14.499	0.0405	100.966	LFL2_D44_4_1_ol_average	0.0001	10.2006	0.03935	0.0308	5.9558	0.0039	1.8067	0.00485	18.0422	LFL2_D44_4_1_ol_average
LFL2_D44_4_1_average	44.316	0.844333	15.1047	0.0203333	8.321	0.133667	7.96267	10.3377	1.406	4.11633	0.836667	0.342333	0.479667	94.1443
LFL2_D44_1_1_1	47.625	0.852	13.653	0.047	7.249	0.105	10.071	8.541	1.636	4.241	0.726	0.387	0.428	95.474	LFL2_D44_1_1_ol2	0.012	47.234	0.214	0.239	39.994	0.047	11.821	0.168	99.729	LFL2_D44_1_1_ol2	0.0014	10.4994	0.0343	0.0302	5.9637	0.0083	1.4742	0.0201	18.0316	LFL2_D44_1_1_ol2
LFL2_D44_1_1_2	47.741	0.802	13.863	0.008	7.276	0.185	10.106	8.48	1.678	4.324	0.736	0.378	0.37	95.862	LFL2_D44_1_1_ol3	0.043	49.171	0.228	0.195	41.412	0.081	11.678	0.178	102.986	LFL2_D44_1_1_ol3	0.0048	10.5569	0.0352	0.0238	5.9644	0.0138	1.4067	0.0206	18.0262	LFL2_D44_1_1_ol3
LFL2_D44_1_1_average	47.683	0.827	13.758	0.0275	7.2625	0.145	10.0885	8.5105	1.657	4.2825	0.731	0.3825	0.399	95.668	LFL2_D44_1_1_ol_average	0.0275	48.2025	0.221	0.217	40.703	0.064	11.7495	0.173	101.358	LFL2_D44_1_1_ol_average	0.0031	10.5282	0.03475	0.027	5.96405	0.01105	1.44045	0.02035	18.0289	LFL2_D44_1_1_ol_average
P2_4_4_1	44.981	0.937	10.334	0.065	7.231	0.13	8.143	11.463	1.778	5.073	1.042	0.456	0.875	92.405	p2_4_4_ol1	0.022	48.421	0.282	0.182	40.057	0.049	10.078	0.216	99.307	p2_4_4_ol1	0.0026	10.7289	0.0448	0.023	5.954	0.0086	1.2527	0.0258	18.0405	p2_4_4_ol1
															p2_4_4_ol2	0.035	49.514	0.296	0.174	41.005	0.016	10.12	0.237	101.397	p2_4_4_ol2	0.004	10.7354	0.0461	0.0215	5.9641	0.0028	1.231	0.0278	18.0327	p2_4_4_ol2
															p2_4_4_ol_average	0.0285	48.9675	0.289	0.178	40.531	0.0325	10.099	0.2265	100.352	p2_4_4_ol_average	0.0033	10.7322	0.04545	0.02225	5.95905	0.0057	1.24185	0.0268	18.0366	p2_4_4_ol_average
P1_D50_2_1_1	48.89	1.154	16.305	0	7.495	0.137	4.904	6.608	2.944	6.442	1.081	0.243	0.054	96.202	p1_D50_2_1_ol1	0.013	39.675	0.323	0.457	38.8	0.032	22.19	0.05	101.54	p1_D50_2_1_ol1	0.0016	9.0903	0.0531	0.0595	5.9636	0.0059	2.8524	0.0062	18.0326	p1_D50_2_1_ol1
P1_D50_2_1a	51.164	1.334	17.17	0	7.343	0.094	5.104	6.883	2.96	6.774	1.016	0.241	0.03	100.113	p1_D50_2_1_ol2	0	38.88	0.34	0.438	37.609	0.089	21.778	0.112	99.246	p1_D50_2_1_ol2	0	9.129	0.0574	0.0585	5.9237	0.0165	2.8687	0.0142	18.0681	p1_D50_2_1_ol2
P1_D50_2_1b	50.83	1.276	17.092	0.04	7.497	0.108	5.23	6.685	2.842	6.724	1.046	0.223	0.054	99.647	p1_D50_2_1_ol_average	0.0065	39.2775	0.3315	0.4475	38.2045	0.0605	21.984	0.081	100.393	p1_D50_2_1_ol_average	0.0008	9.10965	0.05525	0.059	5.94365	0.0112	2.86055	0.0102	18.0504	p1_D50_2_1_ol_average
P1_D50_2_1_average	50.2947	1.25467	16.8557	0.0133333	7.445	0.113	5.07933	6.72533	2.91533	6.64667	1.04767	0.235667	0.046	98.654
P1_D49_2_5_1	50.487	1.179	16.712	0	8.225	0.175	4.525	6.117	3.014	6.768	1.161	0.192	0.067	98.579	p1_D49_2_5_ol1	0.015	38.912	0.318	0.453	37.885	0.092	22.379	0.084	100.138	p1_D49_2_5_ol1	0.0018	9.0715	0.0533	0.06	5.9248	0.0169	2.927	0.0105	18.0658	p1_D49_2_5_ol1
P1_D49_2_5a	49.917	1.116	16.692	0.06	8.246	0.118	4.635	6.291	2.857	6.959	1.175	0.168	0.048	98.282	p1_D49_2_5_ol2	0.012	38.928	0.318	0.391	38.071	0.066	22.41	0.063	100.259	p1_D49_2_5_ol2	0.0015	9.0572	0.0532	0.0517	5.9421	0.0122	2.9252	0.0079	18.0511	p1_D49_2_5_ol2
P1_D49_2_5b	50.127	1.134	16.909	0.039	8.208	0.098	4.536	6.198	2.801	7.154	1.204	0.186	0.029	98.623	p1_D49_2_5_ol_average	0.0135	38.92	0.318	0.422	37.978	0.079	22.3945	0.0735	100.198	p1_D49_2_5_ol_average	0.00165	9.06435	0.05325	0.05585	5.93345	0.01455	2.9261	0.0092	18.0585	p1_D49_2_5_ol_average
P1_D49_2_5_average	50.177	1.143	16.771	0.033	8.22633	0.130333	4.56533	6.202	2.89067	6.96033	1.18	0.182	0.048	98.4947
P1_D50_1_4_1	50.145	1.225	17.796	0	7.478	0.156	3.342	5.349	3.26	7.268	1.138	0.282	0.054	97.429	P1_D50_1_4_ol1	0	37.414	0.295	0.492	37.977	0.059	24.417	0.093	100.747	P1_D50_1_4_ol1	0	8.7453	0.0496	0.0653	5.9549	0.0108	3.2021	0.0118	18.0399	P1_D50_1_4_ol1
P1_D50_1_4_2	50.637	1.102	18.059	0	6.992	0.113	3.151	5.264	3.249	7.468	1.113	0.279	0.072	97.436	P1_D50_1_4_ol2	0	37.872	0.298	0.464	38.192	0.083	24.6	0.11	101.619	P1_D50_1_4_ol2	0	8.7777	0.0497	0.0611	5.938	0.0153	3.1988	0.0137	18.0543	P1_D50_1_4_ol2
P1_D50_1_4_average	50.391	1.1635	17.9275	0	7.235	0.1345	3.2465	5.3065	3.2545	7.368	1.1255	0.2805	0.063	97.4325	P1_D50_1_4_ol_average	0	37.643	0.2965	0.478	38.0845	0.071	24.5085	0.1015	101.183	P1_D50_1_4_ol_average	0	8.7615	0.04965	0.0632	5.94645	0.01305	3.20045	0.01275	18.0471	P1_D50_1_4_ol_average
P1_D49_2_7_1	45.932	0.939	12.184	0	7.095	0.076	10.716	8.804	1.695	5.15	0.786	0.369	0.411	94.074	P1_D49_2_7_ol1	0	48.667	0.272	0.235	40.736	0.014	11.489	0.155	101.568	P1_D49_2_7_ol1	0	10.5994	0.0427	0.0291	5.9517	0.0023	1.4038	0.0183	18.0473	P1_D49_2_7_ol1
P1_D49_2_7_2	45.836	0.935	12.216	0.023	7.274	0.131	10.614	8.731	1.828	5.177	0.809	0.394	0.424	94.303	P1_D49_2_7_ol2	0	48.495	0.28	0.217	40.57	0.039	11.475	0.181	101.257	P1_D49_2_7_ol2	0	10.5969	0.0439	0.0269	5.947	0.0068	1.4068	0.0214	18.0497	P1_D49_2_7_ol2
P1_D49_2_7_3	45.773	1.044	11.935	0	7.378	0.102	10.578	8.946	1.752	5.006	0.855	0.355	0.393	94.037	P1_D49_2_7_ol_average	0	48.581	0.276	0.226	40.653	0.0265	11.482	0.168	101.412	P1_D49_2_7_ol_average	0	10.5969	0.0439	0.0269	5.947	0.0068	1.4068	0.0214	18.0497	P1_D49_2_7_ol_average
P1_D49_2_7_average	45.847	0.972667	12.1117	0.00766667	7.249	0.103	10.636	8.827	1.75833	5.111	0.816667	0.372667	0.409333	94.138
P1_D50_1_8_M1_1	43.977	0.949	13.12	0.039	8.359	0.134	9.544	8.963	1.901	4.987	0.876	0.419	0.599	93.772	P1_D50_1_8_ol1	0.005	46.565	0.273	0.25	40.13	0	13.558	0.127	100.908	P1_D50_1_8_ol1	0.0006	10.3074	0.0435	0.0314	5.9589	0	1.6838	0.0152	18.0408	P1_D50_1_8_ol1
P1_D50_1_8_M1_2	44.636	1.03	13.485	0.068	8.253	0.156	9.684	8.748	1.881	5.029	0.914	0.389	0.65	94.835	P1_D50_1_8_ol2	0	46.262	0.252	0.216	40.083	0	13.252	0.109	100.174	P1_D50_1_8_ol2	0	10.296	0.0403	0.0273	5.9843	0	1.6547	0.0131	18.0157	P1_D50_1_8_ol2
P1_D50_1_8_M1_3	44.367	0.969	13.332	0	8.28	0.181	9.295	8.801	1.847	5.106	0.938	0.418	0.709	94.149	P1_D50_1_8_ol_average	0.0025	46.4135	0.2625	0.233	40.1065	0	13.405	0.118	100.541	P1_D50_1_8_ol_average	0.0003	10.3017	0.0419	0.02935	5.9716	0	1.66925	0.01415	18.0282	P1_D50_1_8_ol_average
P1_D50_1_8_M1_average	44.3267	0.982667	13.3123	0.0356667	8.29733	0.157	9.50767	8.83733	1.87633	5.04067	0.909333	0.408667	0.652667	94.252
P1_D50_1_8_M6_1	44.658	0.996	13.194	0.011	8.189	0.144	9.672	9.02	1.635	4.826	0.993	0.441	0.675	94.354	P1_D50_1_8_ol3	0	46.299	0.252	0.23	39.951	0	13.436	0.131	100.299	P1_D50_1_8_ol3	0	10.3058	0.0404	0.0291	5.9656	0	1.6779	0.0158	18.0347	P1_D50_1_8_ol3
P1_D50_1_8_M6_2	44.628	1.09	13.063	0.005	8.495	0.15	9.362	9.362	1.847	4.927	0.91	0.436	0.673	94.85	P1_D50_1_8_ol2	0	46.262	0.252	0.216	40.083	0	13.252	0.109	100.174	P1_D50_1_8_ol2	0	10.296	0.0403	0.0273	5.9843	0	1.6547	0.0131	18.0157	P1_D50_1_8_ol2
P1_D50_1_8_M6_average	44.643	1.043	13.1285	0.008	8.342	0.147	9.517	9.191	1.741	4.8765	0.9515	0.4385	0.674	94.602	P1_D50_1_8_ol_average	0	46.2805	0.252	0.223	40.017	0	13.344	0.12	100.237	P1_D50_1_8_ol_average	0	10.3009	0.04035	0.0282	5.97495	0	1.6663	0.01445	18.0252	P1_D50_1_8_ol_average
P2_D53_3_6_1	48.86	0.993	10.87	0.057	7.524	0.14	9.348	11.503	1.985	5.075	0.907	0.338	0.494	98.018	P2_D53_3_6_ol1	0.057	49.699	0.289	0.167	40.977	0.055	9.899	0.184	101.327	P2_D53_3_6_ol1	0.0066	10.7708	0.045	0.0206	5.9573	0.0094	1.2036	0.0215	18.0348	P2_D53_3_6_ol1
P2_D53_3_6_2	48.629	0.932	11.013	0.017	7.714	0.133	9.281	11.278	2.032	4.913	0.862	0.35	0.472	97.547	P2_D53_3_6_ol2	0.059	49.857	0.258	0.161	41.263	0.049	9.918	0.231	101.796	P2_D53_3_6_ol2	0.0067	10.752	0.04	0.0198	5.9694	0.0083	1.1999	0.0269	18.023	P2_D53_3_6_ol2
P2_D53_3_6_average	48.7445	0.9625	10.9415	0.037	7.619	0.1365	9.3145	11.3905	2.0085	4.994	0.8845	0.344	0.483	97.7825	P2_D53_3_6_ol_average	0.058	49.778	0.2735	0.164	41.12	0.052	9.9085	0.2075	101.561	P2_D53_3_6_ol_average	0.00665	10.7614	0.0425	0.0202	5.96335	0.00885	1.20175	0.0242	18.0289	P2_D53_3_6_ol_average
P2_D53_4_1_1	46.509	1.067	10.886	0.113	7.344	0.12	6.934	13.442	1.504	5.614	1.086	0.594	0.626	95.705	P2_D53_4_1_ol1	0.055	49.383	0.265	0.155	40.932	0	9.798	0.219	100.807	P2_D53_4_1_ol1	0.0064	10.7513	0.0415	0.0192	5.978	0	1.1967	0.0257	18.0188	P2_D53_4_1_ol1
															P2_D53_4_1_ol2	0	49.071	0.265	0.186	40.315	0.042	9.851	0.233	99.963	P2_D53_4_1_ol2	0	10.7889	0.0419	0.0232	5.9461	0.0074	1.2151	0.0276	18.0502	P2_D53_4_1_ol2
															P2_D53_4_1_ol_average	0.0275	49.227	0.265	0.1705	40.6235	0.021	9.8245	0.226	100.385	P2_D53_4_1_ol_average	0.0032	10.7701	0.0417	0.0212	5.96205	0.0037	1.2059	0.02665	18.0345	P2_D53_4_1_ol_average
LM8_D57_4_4_1	45.319	1.072	11.815	0.009	7.246	0.149	6.813	11.548	1.317	5.033	0.712	0.294	0.533	91.794	LM8_D57__4_4_ol2	0.042	48.144	0.265	0.153	40.153	0.022	9.664	0.197	98.64	LM8_D57__4_4_ol2	0.005	10.7105	0.0424	0.0193	5.9924	0.0039	1.2061	0.0236	18.0033	LM8_D57__4_4_ol2
LM8_D57_4_4_2	42.865	1.139	11.112	0.082	6.943	0.161	7.547	10.652	1.367	4.733	0.617	0.242	0.562	87.967	LM8_D57__4_4_ol3	0	49.916	0.276	0.18	41.186	0.05	9.566	0.247	101.421	LM8_D57__4_4_ol3	0	10.7894	0.0429	0.0222	5.9719	0.0086	1.1601	0.0288	18.024	LM8_D57__4_4_ol3
LM8_D57_4_4_average	44.092	1.1055	11.4635	0.0455	7.0945	0.155	7.18	11.1	1.342	4.883	0.6645	0.268	0.5475	89.8805	LM8_D57__4_4_ol_average	0.021	49.03	0.2705	0.1665	40.6695	0.036	9.615	0.222	100.031	LM8_D57__4_4_ol_average		10.75	0.04265	0.02075	5.98215	0.00625	1.1831	0.0262	18.0136	LM8_D57__4_4_ol_average
R6_D54_4_2_1	46.15	1.09	15.439	0.029	7.613	0.068	7.674	9.321	2.142	5.147	0.961	0.513	0.525	96.556	R6_D54_4_4_2_ol1	0.028	47.334	0.258	0.24	40.24	0.028	13.383	0.179	101.69	R6_D54_4_4_2_ol1	0.0033	10.3932	0.0407	0.0299	5.9271	0.0048	1.6486	0.0212	18.0688	R6_D54_4_4_2_ol1
R6_D54_4_2_2	45.679	1.05	15.317	0.078	7.691	0.14	7.441	9.587	2.04	5.185	0.984	0.493	0.495	96.069	R6_D54_4_4_2_ol2	0	46.467	0.249	0.249	39.626	0.038	13.48	0.182	100.291	R6_D54_4_4_2_ol2	0	10.3588	0.0398	0.0315	5.926	0.0068	1.6859	0.0218	18.0706	R6_D54_4_4_2_ol2
R6_D54_4_2_3	45.419	1.113	15.007	0.014	7.469	0.12	7.373	9.41	2.026	5.153	0.95	0.505	0.45	94.895	R6_D54_4_4_2_ol_average	0.014	46.9005	0.2535	0.2445	39.933	0.033	13.4315	0.1805	100.99	R6_D54_4_4_2_ol_average	0.00165	10.376	0.04025	0.0307	5.92655	0.0058	1.66725	0.0215	18.0697	R6_D54_4_4_2_ol_average
R6_D54_4_2_average	45.7493	1.08433	15.2543	0.0403333	7.591	0.109333	7.496	9.43933	2.06933	5.16167	0.965	0.503667	0.49	95.84
SCL12_7_1_2	52.308	1.098	17.88	0	6.369	0.093	4.138	5.271	3.635	8.418	0.712	0.202	0.012	100.09	SCL12_7_1_ol1	0.039	36.643	0.322	0.448	38.04	0.095	25.86	0.069	101.516	SCL12_7_1_ol1	0.0049	8.5502	0.054	0.0594	5.9544	0.0176	3.3854	0.0086	18.0345	SCL12_7_1_ol1
SCL12_7_1_3	52.597	1.264	17.77	0.026	6.588	0.101	4.446	5.424	3.381	7.771	0.315	0.197	0.041	99.877	SCL12_7_1_ol2	0	36.458	0.316	0.466	37.983	0.054	26.005	0.063	101.345	SCL12_7_1_ol2	0	8.5284	0.0531	0.0619	5.9604	0.01	3.4129	0.008	18.0347	SCL12_7_1_ol2
SCL12_7_1_average	52.4525	1.181	17.825	0.013	6.4785	0.097	4.292	5.3475	3.508	8.0945	0.5135	0.1995	0.0265	99.9835	SCL12_7_1_ol-average	0.0195	36.5505	0.319	0.457	38.0115	0.0745	25.9325	0.066	101.43	SCL12_7_1_ol-average	0.00245	8.5393	0.05355	0.06065	5.9574	0.0138	3.39915	0.0083	18.0346	SCL12_7_1_ol-average
SCL14_D49_5_3_M1_2	55.533	0.863	18.87	0	5.926	0.15	3.035	3.641	3.427	9.281	0.426	0.267	0.041	101.4	SCL14_D49_5_3_ol10	0.01	35.303	0.266	0.549	37.773	0.052	27.453	0	101.406	SCL14_D49_5_3_ol10	0.0013	8.3101	0.045	0.0735	5.9647	0.0097	3.6255	0	18.0299	SCL14_D49_5_3_ol10
SCL14_D49_5_3_M1_1	53.322	1.394	18.64	0	6.923	0.112	3.742	4.42	3.117	8.994	0.433	0.276	0.04	101.413	SCL14_D49_5_3_ol11	0	34.923	0.284	0.511	37.605	0.07	27.503	0.075	100.971	SCL14_D49_5_3_ol11	0	8.2639	0.0483	0.0687	5.9693	0.013	3.6513	0.0096	18.0241	SCL14_D49_5_3_ol11
SCL14_D49_5_3_M1_3	54.712	0.98	19.289	0	5.304	0.041	2.801	3.592	3.158	9.841	0.638	0.263	0.043	100.662	SCL14_D49_5_3_ol_average	0.005	35.113	0.275	0.53	37.689	0.061	27.478	0.0375	101.189	SCL14_D49_5_3_ol_average	0.00065	8.287	0.04665	0.0711	5.967	0.01135	3.6384	0.0048	18.027	SCL14_D49_5_3_ol_average
SCL14_D49_5_3_M1_average	54.5223	1.079	18.933	0	6.051	0.101	3.19267	3.88433	3.234	9.372	0.499	0.268667	0.0413333	101.158
SCL14_D49_5_3_M2_1	52.572	1.212	17.891	0	7.781	0.127	4.512	4.681	3.021	8.521	0.805	0.312	0.035	101.47
SCL14_D49_5_3_M2_2	52.315	1.183	17.695	0.013	7.595	0.159	4.343	4.65	2.793	8.223	0.876	0.315	0.047	100.207
SCL14_D49_5_3_M2_3	51.567	1.156	17.176	0	7.322	0.149	4.22	4.268	3.737	9.1	0.826	0.327	0.042	99.816
SCL14_D49_5_3_M2_average	52.1513	1.18367	17.5873	0.00433333	7.566	0.145	4.35833	4.533	3.18367	8.61467	0.835667	0.318	0.0413333	100.498
SCL14_D92_3_1_1	44.995	1.056	15.017	0.024	7.483	0.179	7.833	9.378	1.956	4.963	0.925	0.497	0.454	94.648	SCL14_3_1_ol_1	0.007	46.061	0.272	0.272	39.518	0.031	13.067	0.177	99.405	SCL14_3_1_ol_1	0.0008	10.3411	0.0438	0.0347	5.9517	0.0056	1.6458	0.0215	18.045	SCL14_3_1_ol_1
SCL14_D92_3_1_2	45.231	1.134	15.135	0.079	7.388	0.102	7.998	9.297	2.057	5.117	0.916	0.498	0.499	95.339	SCL14_3_1_ol_2	0.008	47.092	0.282	0.252	40.596	0.015	13.152	0.165	101.562	SCL14_3_1_ol_2	0.0009	10.3314	0.0444	0.0314	5.9746	0.0027	1.6188	0.0196	18.0238	SCL14_3_1_ol_2
SCL14_D92_3_1_average	45.113	1.095	15.076	0.0515	7.4355	0.1405	7.9155	9.3375	2.0065	5.04	0.9205	0.4975	0.4765	94.9935	SCL14_3_1_ol_3	0	46.968	0.28	0.265	40.075	0.013	13.158	0.152	100.911	SCL14_3_1_ol_3	0	10.3828	0.0445	0.0333	5.9429	0.0023	1.632	0.0182	18.0561	SCL14_3_1_ol_3
SCL12_3_3_MS1	51.584	1.271	17.556	0.041	7.074	0.072	4.191	5.582	3.428	6.988	1.098	0.259	0.037	99.123	SCL12_3_3_ol1	0.064	36.595	0.31	0.493	38.092	0.061	26.212	0.09	101.917	SCL12_3_3_ol1	0.0079	8.5203	0.0518	0.0653	5.9494	0.0112	3.4239	0.0113	18.0411	SCL12_3_3_ol1
SCL12_3_3_MS2	50.705	1.317	17.762	0	6.899	0.106	4.111	5.609	3.243	6.9	0.994	0.275	0.016	97.875	SCL12_3_3_ol2	0.048	36.105	0.311	0.492	37.974	0.05	26.25	0.01	101.24	SCL12_3_3_ol2	0.006	8.4632	0.0524	0.0656	5.9712	0.0094	3.452	0.0012	18.021	SCL12_3_3_ol2
SCL12_3_3_MS_average	51.1445	1.294	17.659	0.0205	6.9865	0.089	4.151	5.5955	3.3355	6.944	1.046	0.267	0.0265	98.499	SCL12_3_3_ol_average	0.056	36.35	0.3105	0.4925	38.033	0.0555	26.231	0.05	101.578	SCL12_3_3_ol_average	0.00695	8.49175	0.0521	0.06545	5.9603	0.0103	3.43795	0.00625	18.0311	SCL12_3_3_ol_average
SCL14_D49_5_4_M1_2	54.636	1.082	17.687	0.004	6.294	0.097	4.213	4.507	3.062	8.975	0.445	0.253	0.022	101.22	SCL14_D49_5_4_ol1	0.035	36.447	0.283	0.487	37.912	0.034	26.792	0	101.99	SCL14_D49_5_4_ol1	0.0044	8.5014	0.0474	0.0645	5.9322	0.0063	3.5061	0	18.0623	SCL14_D49_5_4_ol1
SC14_D49_5_4_M1_1	53.384	0.992	17.527	0	6.013	0.068	4.254	4.858	3.1	9.179	0.444	0.237	0.058	100.114	SCL14_D49_5_4_ol2	0.013	36.407	0.274	0.507	38.116	0	26.672	0.019	102.008	SCL14_D49_5_4_ol2	0.0016	8.482	0.046	0.0671	5.957	0	3.4863	0.0024	18.0424	SCL14_D49_5_4_ol2
SC14_D49_5_4_M1_average	54.01	1.037	17.607	0.002	6.1535	0.0825	4.2335	4.6825	3.081	9.077	0.4445	0.245	0.04	100.667	SCL14_D49_5_4_ol_average	0.024	36.427	0.2785	0.497	38.014	0.017	26.732	0.0095	101.999	SCL14_D49_5_4_ol_average	0.003	8.4917	0.0467	0.0658	5.9446	0.00315	3.4962	0.0012	18.0524	SCL14_D49_5_4_ol_average
SCL14_6_2_1	52.676	1.08	16.69	0	7.464	0.147	4.823	4.046	2.993	8.038	0.679	0.321	0.084	98.969	SCL14_6_2_ol3	0	34.844	0.298	0.455	37.056	0.057	26.687	0.074	99.471	SCL14_6_2_ol3	0	8.3531	0.0513	0.062	5.9592	0.0108	3.5893	0.0096	18.0353	SCL14_6_2_ol3
SCL14_6_2_2	52.078	1.016	16.53	0	7.685	0.157	4.858	4.141	2.888	7.898	0.693	0.307	0.074	98.256	SCL14_6_2_ol4	0	34.47	0.307	0.553	36.826	0.034	26.954	0.047	99.191	SCL14_6_2_ol4	0	8.306	0.0532	0.0758	5.9527	0.0064	3.6439	0.0061	18.0441	SCL14_6_2_ol4
SCL14_6_2_average	52.377	1.048	16.61	0	7.5745	0.152	4.8405	4.0935	2.9405	7.968	0.686	0.314	0.079	98.6125	SCL14_6_2_ol_average	0	34.657	0.3025	0.504	36.941	0.0455	26.8205	0.0605	99.331	SCL14_6_2_ol_average	0	8.32955	0.05225	0.0689	5.95595	0.0086	3.6166	0.00785	18.0397	SCL14_6_2_ol_average
SCL14_5_9_1	54.221	1.541	16.098	0	6.49	0.141	4.814	5.158	2.989	7.938	0.94	0.335	0.005	100.67	SCL14_D49_5_9_ol11	0	35.074	0.311	0.55	37.458	0.066	27.289	0.018	100.766	SCL14_D49_5_9_ol11	0	8.3128	0.053	0.0741	5.9554	0.0124	3.6285	0.0023	18.0385	SCL14_D49_5_9_ol11
SCL14_5_9_2	53.616	1.707	16.192	0	6.846	0.148	5.203	5.427	2.802	7.644	1.002	0.327	0.052	100.966	SCL14_D49_5_9_ol12	0.016	35.091	0.319	0.499	37.745	0.026	27.442	0.031	101.169	SCL14_D49_5_9_ol12	0.002	8.281	0.0542	0.0669	5.9753	0.0048	3.6332	0.004	18.0215	SCL14_D49_5_9_ol12
SCL14_5_9_average	53.9185	1.624	16.145	0	6.668	0.1445	5.0085	5.2925	2.8955	7.791	0.971	0.331	0.0285	100.818	SCL14_D49_5_9_ol13	0	34.726	0.319	0.531	37.552	0.078	26.887	0.059	100.152	SCL14_D49_5_9_ol13	0	8.2642	0.0546	0.0719	5.9949	0.0146	3.5899	0.0076	17.9978	SCL14_D49_5_9_ol13
															SCL14_D49_5_9_olaverage	#REF!	#REF!	#REF!	#REF!	#REF!	#REF!	#REF!	#REF!	#REF!	SCL14_D49_5_9_olaverage	#REF!	#REF!	#REF!	#REF!	#REF!	#REF!	#REF!	#REF!	#REF!	SCL14_D49_5_9_olaverage
