# Supplementary material for: Constraining the volatile evolution of mafic melts at Mt. Somma–Vesuvius, Italy, based on the composition of reheated melt inclusions and their olivine hosts
Source: Copernicus journal article supplement (doi:10.5194/ejm-35-921-2023), 2023-11-09
Supplement: Supplementary file 3 [file TableS3.xls]

## Sheet: Glass standards SIMS
Appendix Table A-3. Glass standars used for SIMS analyiss of the MI of this study. The volatile compositions of the glass standards used in this study are compared with those of the literature.
		CO2	H2O	F	SiO2	S	Cl
Standards used	Reference	ppm	wt%	ppm	wt%	ppm	ppm		Table notes:
San Carlo Olivine (background control)	Sobolev et al. (2016)	3.23333	0.01	4.1	40.73	0.94	0.76		The volatile compositions of some of the reference glasses resulted from the compilation of more than one data source.
San Carlo Olivine (background control)	This Study	21	0.004	2.45184		0.290173	0.363985		"this study" is referred as to the standard glasses treated as unknown glasses to obtain volatile concentrations using the calibration curves applied to the raw data of the studied MI.
ALV981R23	[1 to 11]	335	0.16	140	49.62	1081	34		We included data reported by Sobolev et al. (2016) because they analyzed most of the reference glasses we used for this study. Also, the SIMS instrument Sobolev et al. (2016) used is the same we employed for this study
ALV981R23	Sobolev et al. (2016)	248	0.14	161		1025	23
ALV981R23	This Study	248	0.164	160		1039.27	25.6979		References:
VG-2	[13 to 20]	n.a.	n.a.	300	50.81	1412	299		[1] Pineau F, Javoy M (1983) Carbon isotopes and concentrations in mid-oceanic ridge basalt. Earth and Planetary Science Letters 62 : 239-257
VG-2	Sobolev et al. (2016)	153	0.28	299		1436	297		[2] Hekinian R, Walker D (1987) Diversity and spatial zonation of volcanic rocks from the East Pacific Rise near 21° N. Contributions to Mineralogy and Petrology 96 : 265-280
VG-2	This Study	184	0.328755	302.762		1437.59	258.715		[3] Fine G, Stolper E (1986) Dissolved carbon dioxide in basaltic glasses: concentrations and speciation. Earth and Planetary Science Letters 76 : 263-278
30-2	[11,12]	102	0.63	473	51.52	1066	314		[4] Metrich N, Clocchiatti R (1989) Melt inclusion investigation of the volatile behaviour in historic alkali basaltic magmas of Etna. Bulletin of Volcanology 51 : 185-198
30-2	Sobolev et al. (2016)	120	0.61	467		1108	300		[5] Metrich N, Clocchiatti R (1996) Sulfur abundance and its speciation in oxidized alkaline melts. Geochimica et Cosmochimica Acta 60 : 4151-4160
30-2	This Study	140	0.716289	465.849		1105.52	335.678		[6] Metrich N, Sigurdsson H, Meyer PS, Devine JD (1991) The 1783 Lakagigar eruption in Iceland: geochemistry, CO2 and sulfur degassing. Contributions to Mineralogy and Petrology 107 : 435-447
40-2	[11,12]	220	0.15	194	50.71	1257	11		[7] Mosbah M, Metrich N, Massiot P (1991) PIGME fluorine determination using a nuclear microprobe with application to glass inclusions. Nucl Instr Meth Phys Res B58 : 227-231
40-2	Sobolev et al. (2016)	248	0.15	211		1246	10		[8] Jambon A, Déruelle B, Dreibus G, Pineau F (1995) Chlorine and bromine abundance in MORB: the contrasting behaviour of the Mid-Atlantic Ridge and East Pacific Rise and implications for chlorine geodynamic cycle. Chemical Geology 126 : 101-117
40-2	This Study	247	0.169238	214.867		1295.39	11.7685		[9] Macpherson CG, Hilton DR, Newman S, Mattey DP (1999) CO2, 13C/12C and H2O variability in natural basaltic glasses: a study comparing stepped heating and FTIR spectroscopic techniques. Geochimica et Cosmochimica Acta 63 : 1805-1813
KL2-G	[11,21]	5.2	0.02	177	50.3	7.7	26		[10] Hauri E, Wang J, Dixon JE, King PL, Mandeville C, Newman S (2002) SIMS analysis of volatiles in silicate glasses - 1. Calibration, matrix effects and comparisons with FTIR. Chemical Geology 183 : 99-114
KL2-G	Sobolev et al. (2016)	3.2	0.02	134		7.8	21		[11] Author's unpublished data
KL2-G	This Study	28.4	0.0113374	152.704		8.65209	27.5332		[12] E.Hauri, personal communication, 2003
CLDR01-5V	[8,22]	n.a.	0.16	n.a.	50.43	957	62		[13] Jarosewich EJ, Nelen JA, Norberg JA (1980) Reference samples for electron microprobe analysis. Geostandards Newsletter 4 : 43-47
CLDR01-5V	Sobolev et al. (2016)	132	0.15	164		1089	62		[14] Dixon JE, Clague DA, Stolper EM (1991) Degassing history of water, sulfur and carbon in submarine lavas from Kilauea volcano, Hawaii. Journal of Geology 99 : 371-394
CLDR01-5V	This Study	151	0.159831	163.341		1101.93	67.9252		[15] Thordarson T, Self S, Oskarsson N, Hulsebosch T (1996) Sulfur, chlorine, and fluorine degassing and atmospheric loading by the 1783-1784 AD Laki (Skaftár Fires) eruption in Iceland. Bulletin of Volcanology 58 : 205-225
CY84-06-02	[11,23]	n.a.	n.a.	n.a.	50.61	1196	n.a.		[16] Straub SM, Layne GD (2003) The systematics of chlorine, fluorine, and water in Izu arc front volcanic rocks: Implications for volatile recycling in subduction zones. Geochimica et Cosmochimica Acta 67 : 4179-4203
CY84-06-02	Sobolev et al. (2016)	240	0.19	189		1229	143		[17] Gurenko AA, Trumbull RB, Thomas R, Lindsay JM (2005) A melt inclusion record of volatiles, trace elements and Li–B isotope variations in a single magma system from the Plat Pays Volcanic Complex, Dominica, Lesser Antilles. Journal of Petrology 46 : 2495-2526
CY84-06-02	This Study	286	0.221406	191.286		1236.41	126.608		[18] Gurenko AA, Belousov AB, Trumbull RB, Sobolev AV (2005) Explosive basaltic volcanism of the Chikurachki Volcano (Kurile arc, Russia): Insights on pre-eruptive magmatic conditions and volatile budget revealed from phenocryst-hosted melt inclusions and matrix glasses. Journal of Volcanology and Geothermal Research 147 : 203-232
Etna-II-6	[24]	365	1.19	n.a.	47.79	n.a.	n.a.		[19] Gurenko A, Sobolev A (2006) Crust-primitive magma interaction beneath neovolcanic rift zone of Iceland recorded in gabbro xenoliths from Midfell, SW Iceland. Contributions to Mineralogy and Petrology 151 : 495-520
Etna-II-6	Sobolev et al. (2016)	224	1.13	1045		48	1078		[20] Witter JB, Kress VC, Newhall CG (2005) Volcán Popocatépetl, Mexico. Petrology, Magma Mixing, and Immediate Sources of Volatiles for the 1994–Present Eruption. Journal of Petrology 46 : 2337-2366
Etna-II-6	This Study	237	1.28291	1053.66		46.5993	904.307		[21] Jochum KP, Stoll B, Herwig K et al (2006) MPI-DING reference glasses for in situ microanalysis: New reference values for element concentrations and isotope ratios. Geochemistry, Geophysics, Geosystems 7 : Q02008
Etna-II-7	[24]	297	1.47	n.a.	47.98	n.a.	n.a.		[22] Chaussidon M, Sheppard SM, Michard A (1991) Hydrogen, sulphur and neodymium isotope variations in the mantle beneath the EPR at 12°50'N. In: Taylor HP, O'Neil JR, Kaplan IR (eds), Stable Isotope Geochemistry: A Tribute to Samuel Epstein. Geochem Soc Spec Pub, vol 3 : 325-337
Etna-II-7	Sobolev et al. (2016)	179	1.48	1054		50	1092		[23] Labidi J, Cartigny P, Birck JL, Assayag N, Bourrand JJ (2012) Determination of multiple sulfur isotopes in glasses: A reappraisal of the MORB δ34S. Chemical Geology 334 : 189-198
Etna-II-7	This Study	217	1.57777	1036.74		45.7777	827.889		[24] ETNA II-6 and ETNA II-7 are experimental glasses synthesized at ISTO (Orléans, France); N.Metrich, personal communication, 2002
M40	[25]	2183	3.07	n.a.	47.51	n.a.	n.a.		[25] Shishkina TA, Botcharnikov RE, Holtz F, Almeev RR, Portnyagin MV (2010) Solubility of H2O- and CO2-bearing fluids in tholeiitic basalts at pressures up to 500 MPa. Chemical Geology 277 : 115-125
M40	This Study	2054	3.01178	n.a.		n.a.	n.a.		Sobolev AV, Asafov EV, Gurenko AA, Arndt NT, Batanova VG, Portnyagin MV, Portnyagin MV, Garbe-Schönberg D, Krasheninnikov SP (2016) Komatiites reveal a hydrous Archaean deep-mantle reservoir. Nature 531: 628-632
M43	[25]	3172	2.62	n.a.	47.46	n.a.	n.a.
M43	This Study	3239	2.51079	n.a.		n.a.	n.a.
29-3	[11]	151	0.5	350	52.39	1051	192
29-3	This Study	183	0.534419	366.03		999.085	152.535
CY82-29-3V	[11,22]	235	0.4	365	49.29	1011	103
CY82-29-3V	This Study	264	0.423571	364.026		957.964	79.9163

## Sheet: Glass Standards raw analysis 
Raw analysis of the glass standards used for this study
Analysis Name	12C	16O 1H	19F	27Al	30Si	32S	35Cl	12C /30Si	Error	16O 1H /30Si	Error	19F /30Si	Error	27Al /30Si	Error	32S /30Si	Error	35Cl /30Si	Error	nb cycles	CO2 ppm	H2O wt%	F ppm	S ppm	Cl ppm
alv981r23_N8@1	3850.31	90043.6	73952.7	184461	203717	345742	9082.77	0.0185994	3.53915e-05	0.437969	0.0024407	0.359571	0.00238354	0.903721	0.00573464	1.71532	0.00579213	0.044051	0.000336052	10
alv981r23_N8@2	3805.31	88040.7	73729.6	183187	201331	340708	7406.07	0.0186349	5.02666e-05	0.433801	0.00333284	0.363004	0.00329125	0.908452	0.0129727	1.70939	0.00952968	0.0363093	0.000364344	10
alv981r23_N8@3	4050.82	85050.5	76723	189675	209360	364976	17028	0.0190315	1.95347e-05	0.402236	0.0025421	0.362942	0.00306784	0.904074	0.00932068	1.76316	0.0284046	0.0803821	0.000728648	10
alv981r23_N8@4	4078.06	81553.6	77833.5	190564	213160	359971	5781.23	0.0188272	0.000223223	0.378765	0.00304971	0.361611	0.00308619	0.892234	0.00588609	1.70702	0.00597916	0.0267601	0.00025118	10
alv981r23_N8@5	4176.18	84912.6	79806	191318	217792	369866	6690.37	0.0188536	3.66429e-05	0.385866	0.00267566	0.362814	0.00323322	0.876203	0.00746583	1.71775	0.00751394	0.0303202	0.000307355	10
ALV981R23								0.0187893	0.937627	0.407727	6.65072	0.361988	0.405269	0.896937	1.45534	1.72253	1.34247	0.0343601	22.0236		247.882	0.163875	160.453	1039.27	25.6979
30-2_N8@11	1947.69	298062	178352	137398	175417	309829	77760.7	0.0109472	9.48104e-05	1.7117	0.0133903	1.01674	0.0120865	0.780464	0.00858803	1.78479	0.0128374	0.441193	0.00485265	10
30-2_N8@12	2042.51	291367	172797	135500	170249	299772	74583.5	0.011828	8.59728e-05	1.72331	0.0101158	1.01465	0.00914645	0.793306	0.00746224	1.77841	0.00707286	0.436067	0.00390994	10
30-2_N8@13	1907.22	286027	169034	134551	169196	288674	70479.3	0.0111549	6.4536e-05	1.70562	0.00986476	0.999328	0.00721607	0.793614	0.00920641	1.72006	0.00630577	0.413406	0.00222517	10
30-2_N8@14	1912.78	311890	185572	143302	183487	319989	80306.3	0.0102712	4.96141e-05	1.71298	0.011988	1.01111	0.0109831	0.778349	0.00412634	1.76213	0.0141851	0.435241	0.00372698	10
30-2_N8@15	1949.36	313495	186464	143204	183004	322203	80225.4	0.0105139	3.8103e-05	1.72856	0.0125181	1.01923	0.0108122	0.78015	0.00576729	1.77843	0.0104611	0.435478	0.00424724	10
30-2								0.010943	5.52742	1.71643	0.541656	1.01221	0.769852	0.785177	0.968623	1.76476	1.49357	0.432277	2.50494		139.686	0.716289	465.849	1105.52	335.678
KL2G_N8@16	336.49	5359.1	60570	127920	195030	2559.87	6444.13	0.00169893	2.46818e-05	0.0270815	0.000183166	0.307561	0.00342704	0.652263	0.0078402	0.0129599	9.11613e-05	0.0326719	0.00040685	10
KL2G_N8@17	432.91	5171.3	60011.7	124290	183797	2571.75	6589.05	0.00232365	2.58201e-05	0.0277719	0.000148343	0.323718	0.00359484	0.672942	0.0109591	0.0138236	9.88541e-05	0.0354521	0.000464687	10
KL2G_N9@107	439.37	4701.6	59909.2	106865	164996	2462.07	6320.82	0.00263931	2.0855e-05	0.0282283	0.000171184	0.360792	0.00243215	0.645433	0.00617376	0.0147487	9.57202e-05	0.0378426	0.000258274	10
KL2G_N9@108	491.16	4882.25	60939.5	109861	173471	2546.55	6515.65	0.00279802	2.58747e-05	0.0278191	0.000110124	0.348589	0.00221605	0.630483	0.00431389	0.0145068	4.27361e-05	0.0371283	0.000193241	10
KL2G_N9@109	508.93	4980.55	63090.2	112783	174901	2603.43	6826.17	0.00288906	4.17981e-05	0.0282321	0.000233407	0.358579	0.00321143	0.642466	0.00435566	0.0146935	7.2464e-05	0.0384871	0.000194943	10
KL2-G								0.00246979	19.5004	0.0278266	1.6895	0.339848	6.85123	0.648717	2.415	0.0141465	5.36489	0.0363164	6.41799		28.3505	0.0113374	152.704	8.65209	27.5332
cldr01-5v_N8@21	1914.4	66438.2	61804.5	153392	168821	299135	15164.8	0.0111808	4.69571e-05	0.390249	0.00319366	0.363319	0.00403491	0.906949	0.00811097	1.78972	0.00718822	0.0890697	0.000855192	10
cldr01-5v_N8@22	2221.26	68201.8	63358.6	157004	174103	308411	15520.9	0.0125716	8.96355e-05	0.388131	0.00226027	0.360995	0.00345014	0.899476	0.0125762	1.7901	0.00758409	0.088413	0.000852473	10
cldr01-5v_N8@23	2245.62	69973.4	64462.6	154585	175689	314287	15963.5	0.0126132	9.05059e-05	0.395115	0.00337275	0.364105	0.00399609	0.878036	0.00988029	1.80746	0.00718827	0.0899871	0.000898362	10
cldr01-5v_N8@24	2077.94	68537.6	63168.9	151962	173582	308041	15677.4	0.0117985	4.90222e-05	0.391398	0.00299464	0.361003	0.00411446	0.873589	0.00588638	1.79278	0.00892977	0.0895038	0.000703112	10
cldr01-5v_N8@25	1971.46	65909.7	61104.8	149764	166828	298010	15097.8	0.0116404	6.52143e-05	0.39151	0.00310536	0.363495	0.00427348	0.895426	0.0067015	1.80518	0.00739328	0.0898405	0.000849841	10
CLDR01-5V								0.0119609	5.18099	0.391281	0.648481	0.362583	0.406933	0.890695	1.6041	1.79705	0.477591	0.0893628	0.713433		150.866	0.159831	163.341	1101.93	67.9252
40-2_N8@26	4275.94	92932	107546	165298	225831	456429	3346.4	0.0186431	9.43705e-05	0.407727	0.00309201	0.472388	0.00451816	0.728623	0.0107834	2.05472	0.0100861	0.0145936	9.12692e-05	10
40-2_N8@27	4449.12	102267	113714	152811	250671	482659	3621.52	0.0176596	0.00027536	0.407158	0.00479408	0.452693	0.0105201	0.609398	0.0157288	1.96052	0.0406732	0.0141945	0.00037136	10
40-2_N8@28	4044.14	93262.3	107476	156198	221580	471597	3610.97	0.0180124	6.28044e-05	0.417719	0.00558521	0.481561	0.00682551	0.701989	0.0153739	2.16562	0.0162849	0.0160342	0.000232361	10
40-2_N8@29	4104.48	90332.1	104921	149478	215434	454804	3502.5	0.0187825	5.4957e-05	0.415807	0.00530259	0.483391	0.00642864	0.690696	0.00949701	2.14721	0.0162518	0.016017	0.00021885	10
40-2_N8@30	4101.82	89231.3	104330	150138	215159	460310	3528.3	0.01882	6.46253e-05	0.411693	0.00554461	0.481606	0.00711978	0.69471	0.0105772	2.17633	0.0165445	0.0161469	0.000229446	10
40-2								0.0183835	2.82501	0.412021	1.14482	0.474328	2.70657	0.685083	6.54171	2.10088	4.37948	0.0153972	6.02662		246.983	0.169238	214.867	1295.39	11.7685
SCOL_N8@31	205.84	1245.38	717.03	170.75	106119	63.67	79.78	0.00192697	2.21121e-05	0.0116637	0.000313331	0.00671236	0.000130038	0.00159795	3.01781e-05	0.000596329	2.89799e-05	0.000747162	4.16907e-05	10
SCOL_N8@32	175.19	1222.97	772.57	161	104278	63.17	82.28	0.00166887	2.13809e-05	0.0116552	0.000300402	0.00735986	0.000127668	0.00153289	2.64933e-05	0.000602324	3.60472e-05	0.000784078	3.31419e-05	10
SCOL_N8@33	192.39	1281.03	766.72	179.35	112313	68.2	86.07	0.00170059	2.57982e-05	0.0113268	0.000280079	0.00677686	0.000104339	0.00158451	2.2895e-05	0.000603039	2.52589e-05	0.000761044	3.33399e-05	10
SCOL_N8@34	330.49	1254.67	748.42	176.05	111624	69.2	82.32	0.00293834	2.94206e-05	0.0111515	0.000263199	0.00665285	7.42947e-05	0.00156488	3.72127e-05	0.000615058	1.20929e-05	0.000731454	2.08118e-05	10
SCOL_N8@35	384.4	1301.75	775.17	204.7	124161	64.22	81.55	0.00307124	4.20248e-05	0.0104011	0.000157855	0.00619189	7.76671e-05	0.00163483	4.75324e-05	0.000512845	1.53386e-05	0.000651063	1.69008e-05	10
SCOL								0.0022612	30.4114	0.0112397	4.60361	0.00673876	6.18279	0.00158301	2.3955	0.000585919	7.06768	0.00073496	6.90197		20.9734	0.00370811	2.45184	0.290173	0.363985
CY8406-02_N8@110	2991.22	72968.9	57882.9	105049	137062	267830	27595.8	0.0215253	0.000160647	0.528391	0.00266403	0.419392	0.00243296	0.763927	0.00604094	1.97448	0.00796204	0.200395	0.00110715	10
CY8406-02_N8@111	3139.03	78746.8	61688.8	110028	145177	289114	30132	0.0214242	0.000163594	0.540155	0.00244335	0.422593	0.00267323	0.756013	0.00727751	2.01156	0.00574924	0.205862	0.00111881	10
CY8406-02_N8@112	3151.66	84895.5	66286.3	115468	155152	312277	32834.8	0.0201802	0.00012214	0.545951	0.00311448	0.425152	0.00339528	0.742804	0.00550323	2.03315	0.00802407	0.209345	0.00117736	10
CY8406-02_N8@113	3173.18	81468.2	63882.3	112191	149430	297636	30897.2	0.0209917	9.06293e-05	0.542139	0.00242808	0.424795	0.00229449	0.748605	0.007003	2.0134	0.0043455	0.205242	0.000954029	10
CY8406-02_N8@114	3224.16	85585.4	66810	115049	156908	312623	32939.4	0.0203888	0.000147567	0.543821	0.00328899	0.423604	0.00312239	0.731378	0.00417074	2.01337	0.00998544	0.207857	0.00142907	10
CY8406-02								0.0209021	2.88419	0.540091	1.27387	0.423107	0.545953	0.748545	1.66327	2.00919	1.06151	0.20574	1.65381		286.414	0.221406	191.286	1236.41	126.608
ETNA-II-6_N9@115	2650.76	465076	349726	137439	144053	11858.5	227245	0.0182142	7.44126e-05	3.30186	0.0113643	2.46316	0.0152313	0.953448	0.00976809	0.0815789	0.000262798	1.58735	0.00804428	10
ETNA-II-6_N9@116	2491.51	406032	304154	123114	126351	10061.1	190374	0.0195526	6.44985e-05	3.27782	0.0105547	2.43759	0.00998778	0.974307	0.00756385	0.0789943	0.000411465	1.51351	0.00509857	10
ETNA-II-6_N9@117	2569.93	444559	331751	131764	135213	10968.5	210314	0.0188364	6.75737e-05	3.36138	0.0174386	2.48838	0.0171556	0.97426	0.00531863	0.0804248	0.000242936	1.56379	0.00843767	10
ETNA-II-6_N9@118	2485.57	432130	324533	127979	133402	10725.4	206043	0.0184432	9.68155e-05	3.30603	0.0138617	2.46507	0.0160162	0.958793	0.00578883	0.0797427	0.000215722	1.55358	0.00494857	10
ETNA-II-6_N9@119	2530.56	440306	330965	133835	134640	10873.6	208330	0.018473	0.000118696	3.32378	0.0155212	2.48635	0.0144131	0.992284	0.00877392	0.0802249	0.000223599	1.56293	0.00608318	10
Etna-II-6								0.0187039	2.80241	3.31417	0.937346	2.46811	0.837393	0.970618	1.57174	0.0801931	1.1855	1.55623	1.73089		237.478	1.28291	1053.66	46.5993	904.307
ETNA-II-7_N9@120	1662.71	390753	235349	99707.8	98658.8	7837.55	137896	0.016706	8.00267e-05	4.03741	0.017618	2.40685	0.0101963	1.01013	0.012693	0.078977	0.000460713	1.40318	0.00713704	10
ETNA-II-7_N9@121	1647.91	381442	231840	98011.8	96715.3	7661.6	135522	0.0168601	8.2803e-05	4.01304	0.0175257	2.41729	0.0108881	1.01228	0.00804621	0.0788086	0.000239041	1.40863	0.00727711	10
ETNA-II-7_N9@122	2167.69	555542	323736	134917	133071	10956.4	203439	0.0161307	0.00010304	4.29898	0.0102627	2.46565	0.0149049	1.01363	0.00830773	0.0816593	0.0002346	1.53752	0.00485207	10
ETNA-II-7_N9@123	1655.01	342211	211067	93267.5	88470.6	6745.37	120220	0.0184524	0.000144287	3.91579	0.0155329	2.40039	0.013133	1.05237	0.00759525	0.0759531	0.000291858	1.36843	0.00650497	10
ETNA-II-7_N9@124	1766.95	383111	231118	99665.2	97178.3	7529.87	133799	0.018135	0.000132371	4.03343	0.0291304	2.4042	0.0107115	1.02668	0.0137988	0.0769382	0.000276359	1.37764	0.00808824	10
Etna-II-7								0.0172569	5.74349	4.05973	3.51233	2.41888	1.11166	1.02302	1.72413	0.0784673	2.79389	1.41908	4.81459		217.211	1.57777	1036.74	45.7777	827.889
VG2_N9@125	2204.66	132048	111101	115247	166578	384394	70702.9	0.0130926	6.97678e-05	0.791173	0.00389045	0.664613	0.00454252	0.689364	0.00560321	2.34322	0.0099118	0.421559	0.00192604	10
VG2_N9@126	2447.28	133443	111355	114561	166528	380887	69856.9	0.014553	9.58278e-05	0.800348	0.00319882	0.666586	0.00338364	0.685436	0.0050702	2.32165	0.0115072	0.416412	0.00188601	10
VG2_N9@127	2439.75	128532	107417	111585	160848	370788	68115.9	0.0149739	0.000110056	0.796269	0.00326707	0.665016	0.00390631	0.690942	0.00409116	2.34091	0.0125816	0.421302	0.00101426	10
VG2_N9@128	2345.56	124499	103400	106767	154668	350522	64246.8	0.0149935	9.35625e-05	0.802794	0.00245481	0.666005	0.00266327	0.687773	0.00436425	2.2983	0.00535311	0.413008	0.00101978	10
VG2_N9@129	2161.76	128925	108062	109494	159896	366955	67718.3	0.0133394	7.9078e-05	0.803421	0.00710723	0.673008	0.00531558	0.681835	0.00541863	2.33049	0.00948013	0.421526	0.00206372	10
VG-2								0.0141905	6.41973	0.798801	0.63919	0.667046	0.513232	0.68707	0.518805	2.32691	0.781018	0.418761	0.929061		184.047	0.328755	302.762	1437.59	258.715
29-3_N9@167	1389.71	157557	89840.9	97088.8	112823	181566	29069.2	0.0121187	0.00017794	1.39274	0.0177052	0.793376	0.00960159	0.859209	0.00973511	1.62123	0.0155014	0.257778	0.0029986	10
29-3_N9@168	905.54	86621.3	54557.8	62733.4	69937.1	113183	17584.5	0.0127601	0.000271675	1.23125	0.0178388	0.778611	0.014035	0.897906	0.0177384	1.6296	0.0131437	0.252391	0.00218972	10
29-3_N9@169	897.11	74996.4	48132.2	68436.5	62244.9	89769.2	13187.6	0.0140438	0.00031158	1.18404	0.0203079	0.766995	0.00798762	1.10433	0.0253627	1.45285	0.01994	0.21401	0.00371068	10
29-3_N9@170	829.12	68819.5	44826.4	58792.6	58134.4	92621.9	14235	0.0143501	0.000368445	1.19025	0.0193485	0.772401	0.00822332	1.01794	0.0270895	1.59358	0.0163197	0.24282	0.00500089	10
29-3_N9@171	1024.28	86647.6	53958.6	66661.1	67985.6	104897	15872.4	0.015444	0.00052207	1.29848	0.0181233	0.799194	0.00692762	0.990103	0.0267074	1.54461	0.0373793	0.230251	0.00545759	10
29-3								0.0137433	9.59598	1.25936	6.94064	0.782115	1.75515	0.973896	10.0267	1.56837	4.62967	0.23945	7.37244		183.048	0.534419	366.03	999.085	152.535
CY82-29-3V_N9@174	1799.53	97188.7	76587.5	77809.8	93527.7	149655	12717.4	0.0192353	0.000211285	1.04339	0.00635603	0.819504	0.0034768	0.832547	0.00987634	1.60437	0.00472307	0.134779	0.000503818	10
CY82-29-3V_N9@175	2013.08	108410	83522.7	87548.2	98842.1	160118	13623.2	0.0200363	0.000394335	1.09196	0.0184742	0.843775	0.0167106	0.88595	0.0154829	1.63173	0.00974089	0.138347	0.00276897	10
CY82-29-3V_N9@176	1784.6	86074.5	68630.1	76719.6	83133.9	129044	10633.2	0.0212806	0.000249717	1.03277	0.00908115	0.823598	0.00616244	0.922642	0.00857232	1.5579	0.0110243	0.127497	0.000955718	10
CY82-29-3V_N9@177	1901.94	101873	79526.4	89784.4	95398.5	150833	12531.9	0.0198853	0.000152699	1.07087	0.012791	0.83387	0.00734429	0.941858	0.00751452	1.58528	0.0221901	0.130284	0.00175975	10
CY82-29-3V_N9@178	2026.97	111398	84989.1	90497.6	104218	167123	14196.3	0.019207	0.000107364	1.06561	0.00534198	0.813021	0.00299939	0.866663	0.00538298	1.61273	0.00755343	0.13581	0.000666219	10
CY82-29-3V								0.0199289	4.23017	1.06092	2.20257	0.826754	1.47082	0.889932	4.90336	1.5984	1.75961	0.133343	3.28441		263.751	0.423571	364.026	957.964	79.9163
M40_N14@179	10144	790006	27997	121640	109094	1554.85	4755.28	0.091224	0.000472486	7.54291	0.0743297	0.254259	0.00189502	1.11307	0.0106278	0.0141943	0.000106154	0.0436034	0.000432021	10
M40_N14@180	10384.2	813141	28316.7	122380	109582	1593.47	4885.25	0.0939178	0.000421067	7.79286	0.0288768	0.256801	0.00119595	1.11739	0.00871775	0.0144405	7.34194e-05	0.0443151	0.000155355	10
M40_N14@181	10311.5	830306	28795.2	123543	111291	1628.5	5006.03	0.0920772	0.000457843	7.85856	0.018102	0.257333	0.000649735	1.11125	0.010474	0.0145205	0.000108869	0.0446337	0.000121431	10
M40_N14@182	14157.5	906324	31048.3	125946	121183	1857.62	5572.42	0.116083	0.000917769	7.91827	0.0228793	0.25471	0.000786357	1.0398	0.00781521	0.0151988	8.04626e-05	0.0455885	0.000192432	10
M40_N14@183	11206.8	923201	31654.2	129277	122171	1837.37	5680.82	0.0912652	0.00030723	8.01866	0.0215132	0.257737	0.00126626	1.05911	0.00739829	0.0149049	9.20801e-05	0.0460599	0.000201822	10
M40								0.0969134	11.1146	7.82625	2.28506	0.256168	0.61691	1.08812	3.31036	0.0146518	2.71827	0.0448401	2.20088		2054.4	3.01178
M43_N14@184	17547.7	842111	33845	138914	133514	564.55	6248.82	0.130188	0.000353768	6.62992	0.0321698	0.251653	0.00151329	1.04046	0.00874199	0.00419116	4.49009e-05	0.0464328	0.000173474	10
M43_N14@185	17371.6	848620	34276.1	138721	135399	562.27	6404.65	0.127105	0.000524443	6.59132	0.0224407	0.251287	0.00119724	1.02456	0.00837529	0.00411513	3.4921e-05	0.0469123	0.000163587	10
M43_N14@186	16290.7	743264	30568.8	134373	121262	501.4	5360.35	0.13345	0.000764486	6.40982	0.0521506	0.250644	0.00208803	1.10946	0.00730586	0.00409926	1.70532e-05	0.0438606	0.000537603	10
M43_N14@187	16941.2	780059	31349.9	132596	125911	518.62	5598.75	0.133705	0.000511663	6.49752	0.0178689	0.247464	0.000711791	1.05384	0.00838595	0.00408183	3.10694e-05	0.0440644	0.000115411	10
M43_N14@188	16939.4	818768	33070.4	137854	131679	539.7	6024.7	0.12751	0.000752861	6.52777	0.028364	0.249374	0.00141156	1.04727	0.00979527	0.00406243	2.92967e-05	0.0453854	0.000235797	10
M43								0.130392	2.40938	6.53127	1.30904	0.250084	0.680683	1.05512	3.05807	0.00410996	1.20336	0.0453311	3.01742		3239.33	2.51079

## Sheet: Melt Inclusion raw analysis
Raw analysis of the glass of melt inclusions reported in this study
Analysis Name	12C	16O 1H	19F	27Al	30Si	32S	35Cl	12C /30Si	Error	16O 1H /30Si	Error	19F /30Si	Error	27Al /30Si	Error	32S /30Si	Error	35Cl /30Si	Error	nb cycles		12C /30Si	16O 1H /30Si	19F /30Si	27Al /30Si	32S /30Si	35Cl /30Si		CO2	H2O	F	Al2O3	S	Cl			SiO2	MI_ID	SiO2	TiO2	Al2O3	Cr2O3	FeO	MnO	MgO	CaO	Na2O	K2O	P2O5
																						Measured							Volatile concentrations in melt inclusions and host olivines						Notes		True	Major element composition
SCL14-3-1-mi1@1	2943.26	217976	174960	31509.9	27301.9	105242	186548	0.108007	0.00160774	8.00243	0.297082	6.4128	0.223404	1.15811	0.0184574	3.8522	0.0639927	6.83134	0.175336	10		0.108007	8.00243	6.4128	1.15811	3.8522	6.83134		2417.12	3.07472	2717.34	17.7909	2221.84	4884.16			47.435	SCL14_D92_3_1_average	45.113	1.095	15.076	0.0515	7.4355	0.1405	7.9155	9.3375	2.0065	5.04	0.9205
SCL14-3-1-mi1@2	2652.76	215643	177783	27269.5	25865.5	101343	189331	0.102233	0.000517292	8.37729	0.064355	6.90348	0.0345154	1.05392	0.00825211	3.93245	0.0315428	7.37331	0.0556711	10		0.102233	8.37729	6.90348	1.05392	3.93245	7.37331		2223.28	3.21875	2925.26	17.0747	2268.13	5271.65			47.435	SCL14_D92_3_1_average	45.113	1.095	15.076	0.0515	7.4355	0.1405	7.9155	9.3375	2.0065	5.04	0.9205
SCL14-3-1-mi1								0.10512	2.74639	8.18986	2.28858	6.65814	3.68484	1.10602	4.7101	3.89233	1.03084	7.10232	3.81546			0.10512	8.18986	6.65814	1.10602	3.89233	7.10232	average	2319.29	3.14674	2821.3	17.4547	2244.98	5077.91			47.435	SCL14_D92_3_1_average	45.113	1.095	15.076	0.0515	7.4355	0.1405	7.9155	9.3375	2.0065	5.04	0.9205
SCL14-3-1-ol@3	58.24	775.92	634.05	56.8	32542.2	13.4	34.95	0.00177362	4.48756e-05	0.0237043	0.000122007	0.0193997	0.000195164	0.0017362	4.57228e-05	0.000409282	1.25489e-05	0.0010737	2.79754e-05	10		0.00177362	0.0237043	0.0193997	0.0017362	0.000409282	0.0010737	host	-4.26471	0.00764372	6.89897	0.0359555	0.198116	0.64426			39.81	SCL14_3_1_ol_average	39.8133		0.0196667	0.005	13.0447	0.261667	46.4163	0.276333
P1-D49-2-7-mi1@4	3433.44	328559	293609	29455.2	34456.8	122700	218716	0.0998215	0.00036015	9.65495	0.0335572	8.61053	0.0321843	0.855451	0.00649706	3.56969	0.0161856	6.37997	0.0306913	10		0.0998215	9.65495	8.61053	0.855451	3.56969	6.37997		2199.79	3.80533	3742.7	15.6195	2111.99	4679.09			48.6583	P1_D49_2_7_average	45.847	0.972667	12.1117	0.00766667	7.249	0.103	10.636	8.827	1.75833	5.111	0.816667
P1-D49-2-7-mi1@5	3563.66	337843	301208	30844.5	35265.2	127773	230092	0.100763	0.000643544	9.66911	0.0389109	8.61411	0.0264668	0.874097	0.004111	3.63731	0.0208544	6.57704	0.0190275	10		0.100763	9.66911	8.61411	0.874097	3.63731	6.57704		2231.19	3.81091	3744.25	15.8253	2152	4823.62			48.6583	P1_D49_2_7_average	45.847	0.972667	12.1117	0.00766667	7.249	0.103	10.636	8.827	1.75833	5.111	0.816667
P1-D49-2-7-mi1								0.100292	0.469398	9.66203	0.0732507	8.61232	0.0208132	0.864774	1.07809	3.6035	0.938352	6.4785	1.52092			0.100292	9.66203	8.61232	0.864774	3.6035	6.4785	average	2215.46	3.80812	3743.47	15.7231	2132	4751.35			48.6583	P1_D49_2_7_average	45.847	0.972667	12.1117	0.00766667	7.249	0.103	10.636	8.827	1.75833	5.111	0.816667
P1-D49-2-7-ol@6	81.94	819.48	885.83	39.85	33317.3	20.43	41.55	0.00245889	0.000141802	0.0245959	0.000419223	0.0265812	0.000196297	0.00119557	3.18158e-05	0.000612562	2.26797e-05	0.00124558	4.97742e-05	10		0.00245889	0.0245959	0.0265812	0.00119557	0.000612562	0.00124558	host	3.20754	0.00798222	9.51367	0.0249231	0.298422	0.7522			40.066	P1_D49_2_7_ol_average	40.066		0.039		11.333	0.214	47.893	0.277
R6-D54-4-2-mi1@7	2950.4	291129	220830	32381.2	31236.7	137502	258876	0.0944801	0.000348516	9.41123	0.0497744	7.1198	0.0256073	1.03726	0.00585414	4.41591	0.0371411	8.34762	0.0328215	10		0.0944801	9.41123	7.1198	1.03726	4.41591	8.34762		1984.64	3.63462	3032.44	17.0312	2560.08	5998.95			47.679	R6_D54_4_2_average	45.7493	1.08433	15.2543	0.0403333	7.591	0.109333	7.496	9.43933	2.06933	5.16167	0.965
R6-D54-4-2-mi1@8	2999.96	250671	188944	26719.7	26532.2	117239	220790	0.112679	0.00167629	9.50554	0.0340477	7.15401	0.0321253	1.00642	0.00553848	4.43577	0.0293188	8.38951	0.0297196	10		0.112679	9.50554	7.15401	1.00642	4.43577	8.38951		2592.58	3.67104	3047.01	16.776	2571.59	6029.05			47.679	R6_D54_4_2_average	45.7493	1.08433	15.2543	0.0403333	7.591	0.109333	7.496	9.43933	2.06933	5.16167	0.965
R6-D54-4-2-mi1								0.10358	8.78498	9.45838	0.498563	7.13691	0.239684	1.02184	1.50939	4.42584	0.224319	8.36856	0.250312			0.10358	9.45838	7.13691	1.02184	4.42584	8.36856	average	2279.5	3.65283	3039.73	16.9055	2565.83	6014			47.679	R6_D54_4_2_average	45.7493	1.08433	15.2543	0.0403333	7.591	0.109333	7.496	9.43933	2.06933	5.16167	0.965
R6-D54-4-2-ol@9	77.22	830.9	667.87	51.35	33811.4	21.48	32.37	0.00227863	3.64243e-05	0.0245186	0.000678568	0.019722	0.000144867	0.00151596	5.06983e-05	0.000633889	3.45848e-05	0.000956696	2.38929e-05	10		0.00227863	0.0245186	0.019722	0.00151596	0.000633889	0.000956696	host	1.2186	0.00785286	6.9662	0.0311846	0.304766	0.570174			39.541	R6_D54_4_4_2_ol_average	39.541		0.033		13.301	0.242	46.4395	0.251
LFL2-D44-1-1-mi1@10	3226.7	337909	221068	37724.3	41476.8	133085	234331	0.0775909	0.00031036	8.22494	0.0275622	5.36069	0.015575	0.909083	0.00611171	3.22053	0.0247607	5.69231	0.0160719	10		0.0775909	8.22494	5.36069	0.909083	3.22053	5.69231		1551.67	3.31761	2384.66	16.5751	1950.02	4272.5			49.7975	LFL2_D44_1_1_average	47.683	0.827	13.758	0.0275	7.2625	0.145	10.0885	8.5105	1.657	4.2825	0.731
LFL2-D44-1-1-mi1@11	2996.86	290802	195563	36681.3	36372.2	116167	201616	0.0818997	0.000901123	8.03633	0.12264	5.39341	0.062565	1.00755	0.00596194	3.20627	0.0420948	5.58746	0.0964622	10		0.0818997	8.03633	5.39341	1.00755	3.20627	5.58746		1678.4	3.24153	2399.21	17.5315	1941.39	4193.8			49.7975	LFL2_D44_1_1_average	47.683	0.827	13.758	0.0275	7.2625	0.145	10.0885	8.5105	1.657	4.2825	0.731
LFL2-D44-1-1-mi1								0.0797453	2.70161	8.13063	1.15984	5.37705	0.304228	0.958315	5.13735	3.2134	0.22193	5.63989	0.92954			0.0797453	8.13063	5.37705	0.958315	3.2134	5.63989	average	1614.5	3.27957	2391.93	17.0738	1945.71	4233.15			49.7975	LFL2_D44_1_1_average	47.683	0.827	13.758	0.0275	7.2625	0.145	10.0885	8.5105	1.657	4.2825	0.731
LFL2-D44-1-1-ol@12	102.8	844.98	615.8	64.45	39370.3	28.73	38.9	0.00260534	9.2741e-05	0.0214891	0.000755736	0.0156439	0.000210294	0.00164316	5.67531e-05	0.000733031	2.96535e-05	0.000985864	3.53773e-05	10		0.00260534	0.0214891	0.0156439	0.00164316	0.000733031	0.000985864	host	4.82129	0.0069898	5.6118	0.0343265	0.357922	0.59671			40.157	LFL2_D44_1_1_ol_average	40.157		0.063	0.027	11.596	0.2145	47.5535	0.218
LFL2-D44-3-2-mi1@13	1867.66	230024	187126	24680.5	25238.8	96577.8	158465	0.0755388	0.00117898	9.32753	0.154769	7.53113	0.083914	0.984453	0.011412	3.81794	0.0700194	6.2458	0.0870951	10		0.0755388	9.32753	7.53113	0.984453	3.81794	6.2458		1452.59	3.66096	3259.87	16.8551	2249.45	4561.59			48.4555	LFL2_D44_3_2_average	46.531	0.8435	14.429	0	8.133	0.165	9.6065	8.9975	1.6175	4.145	0.7035
LFL2-D44-3-2-mi1@14	1656.21	177565	154176	21401.2	20282.1	72540.5	118179	0.0826954	0.00219561	8.89172	0.306965	7.68059	0.147193	1.06012	0.0215922	3.5742	0.0502627	5.81169	0.0680962	10		0.0826954	8.89172	7.68059	1.06012	3.5742	5.81169		1656.39	3.48991	3324.57	17.4906	2105.85	4244.54			48.4555	LFL2_D44_3_2_average	46.531	0.8435	14.429	0	8.133	0.165	9.6065	8.9975	1.6175	4.145	0.7035
LFL2-D44-3-2-mi1								0.0791171	4.52283	9.10962	2.39203	7.60586	0.982512	1.02229	3.70096	3.69607	3.29718	6.02875	3.60037			0.0791171	9.10962	7.60586	1.02229	3.69607	6.02875	average	1553.06	3.57543	3292.22	17.1846	2177.65	4403.07			48.4555	LFL2_D44_3_2_average	46.531	0.8435	14.429	0	8.133	0.165	9.6065	8.9975	1.6175	4.145	0.7035
LFL2-D44-3-2-ol@15	63.17	486.18	418.43	35.65	21559.3	25.3	29.43	0.00295431	7.0462e-05	0.0227079	0.000628726	0.0194714	0.000421879	0.00166988	9.58355e-05	0.00118125	4.88383e-05	0.00136555	4.68648e-05	10		0.00295431	0.0227079	0.0194714	0.00166988	0.00118125	0.00136555	host	8.56371	0.00731322	6.91577	0.0345395	0.571077	0.818349			39.76	LFL2_D44_3_2_ol_average	39.76		0.027		13.952	0.2155	45.686	0.224
P1-D50-2-1-mi1@16	199.36	8948.98	188350	22074.5	24542	7216.68	72139.1	0.0086844	0.000643952	0.377517	0.0117079	7.86908	0.0906708	0.934544	0.059344	0.288499	0.00708015	2.82918	0.136989	10		0.0086844	0.377517	7.86908	0.934544	0.288499	2.82918		107.362	0.155858	3582.85	17.2343	178.795	2173.47			50.9691	P1_D50_2_1_average	50.2947	1.25467	16.8557	0.0133333	7.445	0.113	5.07933	6.72533	2.91533	6.64667	1.04767
P1-D50-2-1-mi1@19	290.7	24545.1	439965	52473.8	57386.6	16055.5	194321	0.00505243	3.82059e-05	0.42703	0.00125712	7.76884	0.0178998	0.914149	0.00598047	0.279423	0.000477615	3.40389	0.00908427	10		0.00505243	0.42703	7.76884	0.914149	0.279423	3.40389		59.5049	0.173966	3490.4	16.7943	170.879	2580.37			50.2947	p1_D50_2_1_ol_average	38.0535		0.061		21.898	0.4455	39.124	0.3305
								0.00686842	26.4396	0.402274	6.15415	7.81896	0.640999	0.924346	1.10321	0.283961	1.59811	3.11653	9.22026			0.00686842	0.402274	7.81896	0.924346	0.283961	3.11653	average	83.4337	0.164912	3536.63	17.0143	174.837	2376.92
P1-D50-2-1-ol@18	75.78	731.3	526.37	83	37886.4	20.02	37.62	0.00199825	3.83587e-05	0.0192864	0.000333012	0.0138828	0.000158502	0.00219804	9.16163e-05	0.00052798	2.01731e-05	0.000995437	3.67753e-05	10		0.00199825	0.0192864	0.0138828	0.00219804	0.00052798	0.000995437	host	-1.74169	0.00594472	4.7192	0.0435051	0.244297	0.570944			38.0535	P1_D50_2_1_average	50.2947	1.25467	16.8557	0.0133333	7.445	0.113	5.07933	6.72533	2.91533	6.64667	1.04767
P2-4-4-mi1@20	4143.39	306651	393091	25213	31359.3	247966	237857	0.132495	0.00114911	9.90069	0.0833063	12.721	0.101111	0.805355	0.00973171	7.95586	0.0553638	7.62165	0.0765517	10		0.132495	9.90069	12.721	0.805355	7.95586	7.62165		3403.59	3.89943	5525.46	15.0275	4703.74	5585.79			48.624	P2_4_4_1	44.981	0.937	10.334	0.065	7.231	0.13	8.143	11.463	1.778	5.073	1.042
P2-4-4-mi1@21	3226.06	265287	332136	23556.7	27248.9	207627	194622	0.120762	0.00470589	9.91474	0.510582	12.3957	0.266717	0.876631	0.0304598	7.59988	0.216999	7.06748	0.329822	10		0.120762	9.91474	12.3957	0.876631	7.59988	7.06748		2943.18	3.90496	5384.16	15.8416	4493.27	5179.65			48.624	P2_4_4_1	44.981	0.937	10.334	0.065	7.231	0.13	8.143	11.463	1.778	5.073	1.042
P2-4-4-mi1								0.126629	4.63284	9.90771	0.0709094	12.5583	1.29512	0.840993	4.23761	7.77787	2.28846	7.34456	3.77263			0.126629	9.90771	12.5583	0.840993	7.77787	7.34456	average	3169.52	3.9022	5454.81	15.4451	4598.5	5382.72			48.624	P2_4_4_1	44.981	0.937	10.334	0.065	7.231	0.13	8.143	11.463	1.778	5.073	1.042
P2-4-4-ol@22	56.39	627.98	809.15	36.95	25580.2	17.02	31.8	0.00220459	6.06327e-05	0.0245368	0.000796723	0.0316082	0.00049365	0.00144433	5.70775e-05	0.000666074	2.79479e-05	0.00123953	4.9393e-05	10		0.00220459	0.0245368	0.0316082	0.00144433	0.000666074	0.00123953	host	0.427934	0.00802715	11.4039	0.0303487	0.327104	0.754573			40.3885	p2_4_4_ol_average	40.3885		0.0325	0.0285	10.0645	0.1775	48.7955	0.288
P1-D49-2-5-mi1@24	214.39	10069.5	239564	33516.2	29521.3	7440.82	75223.6	0.00735123	0.000321895	0.340532	0.0113515	8.16864	0.135996	1.15403	0.0451215	0.251115	0.00566104	2.56593	0.0706205	10		0.00735123	0.340532	8.16864	1.15403	0.251115	2.56593		89.6699	0.140498	3716.83	19.0774	155.526	1969.95			50.9362	P1_D49_2_5_average	50.177	1.143	16.771	0.033	8.22633	0.130333	4.56533	6.202	2.89067	6.96033	1.18
P1-D49-2-5-mi1								0.00735123	4.3788	0.340532	#DIV/0!	8.16864	#DIV/0!	1.15403	#DIV/0!	0.251115	#DIV/0!	2.56593	#DIV/0!			0.00735123	0.340532	8.16864	1.15403	0.251115	2.56593	average	89.6699	0.140498	3716.83	19.0774	155.526	1969.95			50.9362	P1_D49_2_5_average	50.177	1.143	16.771	0.033	8.22633	0.130333	4.56533	6.202	2.89067	6.96033	1.18
P1-D49-2-5-ol@25	54.37	142.57	97.52	10.8	3377.5	9.75	9.75	0.0163756	0.000337497	0.0419103	0.00187488	0.0289193	0.000819018	0.00322169	0.000143129	0.00288024	0.000116231	0.00284647	0.000106778	10		0.0163756	0.0419103	0.0289193	0.00322169	0.00288024	0.00284647	host	147.12	0.0128671	9.79172	0.0634922	1.32741	1.62617	Spot touching a fracture		37.903	p1_D49_2_5_ol_average	37.903		0.079		22.35	0.421	38.8425	0.3175
P1-D50-1-4-mi1@25	645.26	60984	503499	62422.8	58077.2	23044.3	202957	0.0111973	0.00019244	1.05519	0.0271909	8.83463	0.0818732	1.07896	0.0171289	0.395373	0.00315993	3.49681	0.0421366	10		0.0111973	1.05519	8.83463	1.07896	0.395373	3.49681		143.73	0.441752	4078.97	18.8095	248.471	2724.09			51.685	P1_D50_1_4_average	50.391	1.1635	17.9275	0	7.235	0.1345	3.2465	5.3065	3.2545	7.368	1.1255
P1-D50-1-4-mi1@26	526.56	37374.2	317934	40814.5	36055.4	14158	122692	0.0148844	0.000830145	1.05007	0.0460209	9.02048	0.369402	1.15916	0.0603484	0.391037	0.00913192	3.41557	0.111028	10		0.0148844	1.05007	9.02048	1.15916	0.391037	3.41557		197.603	0.439609	4164.77	19.3917	245.747	2660.81			51.685	P1_D50_1_4_average	50.391	1.1635	17.9275	0	7.235	0.1345	3.2465	5.3065	3.2545	7.368	1.1255
P1-D50-1-4-mi1								0.0130408	14.1365	1.05263	0.243154	8.92755	1.04086	1.11906	3.58346	0.393205	0.551366	3.45619	1.17517			0.0130408	1.05263	8.92755	1.11906	0.393205	3.45619	average	170.261	0.44068	4121.87	19.1147	247.109	2692.45			51.685	P1_D50_1_4_average	50.391	1.1635	17.9275	0	7.235	0.1345	3.2465	5.3065	3.2545	7.368	1.1255
P1-D50-1-4-ol@27	114.67	867.35	732.97	99.75	41396.2	23.68	46.65	0.00289604	9.9586e-05	0.0215869	0.000802721	0.0179685	0.000494417	0.00243928	8.13268e-05	0.000568224	2.91555e-05	0.00110038	2.91311e-05	10		0.00289604	0.0215869	0.0179685	0.00243928	0.000568224	0.00110038	host	7.50788	0.0065814	6.04163	0.0477508	0.260057	0.624271			37.6395	P1_D50_1_4_ol_average	37.6395		0.0705		24.222	0.4725	37.203	0.293
P1-D50-1-8-mi1@28	2564.54	207888	221870	29749.7	24340.2	121742	133838	0.103971	0.00192241	8.50818	0.345745	9.09874	0.192657	1.22093	0.0142964	5.03915	0.111213	5.53865	0.161448	10		0.103971	8.50818	9.09874	1.22093	5.03915	5.53865		2259.14	3.23792	3818.76	17.9654	2878.76	3922.23			46.9833	P1_D50_1_8_M1_average	44.3267	0.982667	13.3123	0.0356667	8.29733	0.157	9.50767	8.83733	1.87633	5.04067	0.909333
P1-D50-1-8-mi1@29	3287.71	333390	332488	34554	36315.2	198795	246456	0.0905171	0.000380024	9.28348	0.0522525	9.25551	0.024965	0.95176	0.00466677	5.50419	0.015335	6.83351	0.0354252	10		0.0905171	9.28348	9.25551	0.95176	5.50419	6.83351		1834.75	3.53297	3884.56	16.0485	3144.43	4839.19			46.9833	P1_D50_1_8_M1_average	44.3267	0.982667	13.3123	0.0356667	8.29733	0.157	9.50767	8.83733	1.87633	5.04067	0.909333
P1-D50-1-8-mi1								0.097244	6.9176	8.89583	4.35762	9.17713	0.854151	1.08634	12.3887	5.27167	4.4108	6.18608	10.4659			0.097244	8.89583	9.17713	1.08634	5.27167	6.18608	average	2042.04	3.38544	3851.66	17.1514	3011.6	4380.71			46.9833	P1_D50_1_8_M1_average	44.3267	0.982667	13.3123	0.0356667	8.29733	0.157	9.50767	8.83733	1.87633	5.04067	0.909333
P1-D50-1-8-mi2@30	3515.04	308944	295788	32140.1	32894.4	180542	220239	0.106762	0.000255953	9.48453	0.0207461	9.07614	0.0297188	0.977085	0.00604667	5.51695	0.0288834	6.73912	0.0265136	10		0.106762	9.48453	9.07614	0.977085	5.51695	6.73912		2360.02	3.62163	3822.1	16.3329	3162.33	4788.42			47.1415	P1_D50_1_8_M6_average	44.643	1.043	13.1285	0.008	8.342	0.147	9.517	9.191	1.741	4.8765	0.9515
P1-D50-1-8-mi2@31	3342.24	292415	277931	29761	30971.1	169200	206109	0.107724	0.00054624	9.52304	0.0406174	9.04919	0.031641	0.960684	0.00431377	5.49133	0.0231391	6.69924	0.0224505	10		0.107724	9.52304	9.04919	0.960684	5.49133	6.69924		2392.56	3.63634	3810.75	16.1849	3147.65	4760.08			47.1415	P1_D50_1_8_M6_average	44.643	1.043	13.1285	0.008	8.342	0.147	9.517	9.191	1.741	4.8765	0.9515
P1-D50-1-8-mi2								0.107243	0.448514	9.50378	0.20263	9.06266	0.148648	0.968884	0.846386	5.50414	0.23267	6.71918	0.29674			0.107243	9.50378	9.06266	0.968884	5.50414	6.71918	average	2376.26	3.62898	3816.42	16.2594	3154.99	4774.25			47.1415	P1_D50_1_8_M6_average	44.643	1.043	13.1285	0.008	8.342	0.147	9.517	9.191	1.741	4.8765	0.9515
P1-D50-1-8-ol@32	71.76	658.33	994.32	53.45	40260.3	22.87	39.62	0.00177519	2.81407e-05	0.0163001	0.000398096	0.0246415	0.000100435	0.0013252	2.78881e-05	0.000567994	2.3916e-05	0.000984064	2.80465e-05	10		0.00177519	0.0163001	0.0246415	0.0013252	0.000567994	0.000984064	host	-4.25636	0.00526683	8.78092	0.0275035	0.275501	0.591675			39.891	P1_D50_1_8_ol_average	39.891				13.3325	0.232	46.164	0.2615
SCL12-3-3-mi1@33	155.15	18501.2	349023	46981.8	43595.2	11912.3	140847	0.00355057	2.93588e-05	0.423802	0.00149781	8.08982	0.0251338	1.0776	0.00303953	0.272989	0.00112104	3.24269	0.016414	10		0.00355057	0.423802	8.08982	1.0776	0.272989	3.24269		42.5058	0.178133	3750.01	18.8737	172.245	2536.22			51.8915	SCL12_3_3_MS_average	51.1445	1.294	17.659	0.0205	6.9865	0.089	4.151	5.5955	3.3355	6.944	1.046
SCL12-3-3-ol@35	3256.36	3892.92	851.95	139.35	40268.2	63.2	177.7	0.0835228	0.00458946	0.0986189	0.00414176	0.021528	0.000733789	0.00356256	0.000209215	0.00156068	3.65643e-05	0.0043527	0.000181769	10		0.0835228	0.0986189	0.021528	0.00356256	0.00156068	0.0043527	host	832.087	0.0299096	7.20055	0.0693493	0.710532	2.45646	Spot touching the host/MI wall		37.4425	SCL12_3_3_ol_average	37.4425		0.0545	0.055	25.8235	0.485	35.785	0.3055
P2-D53-4-1-mi1@76	6267.93	376580	470156	36886.1	37868.7	193670	312275	0.164939	0.000837082	10.0472	0.0419316	12.5952	0.0461071	0.973481	0.00659935	5.1462	0.0307229	8.33829	0.0547874	10		0.164939	10.0472	12.5952	0.973481	5.1462	8.33829		4828.02	3.94931	5460.03	16.7802	3036.58	6098.94			48.528	P2_D53_4_1_1	46.509	1.067	10.886	0.113	7.344	0.12	6.934	13.442	1.504	5.614	1.086
P2-D53-4-1-mi1@77	5503.77	394900	420944	31867.3	31046	163263	266716	0.176726	0.00155126	12.8629	0.103245	13.7293	0.0917134	1.02643	0.00699406	5.28302	0.073298	8.66844	0.06842	10		0.176726	12.8629	13.7293	1.02643	5.28302	8.66844		5406.35	5.05612	5951.67	17.245	3117.31	6340.43			48.528	P2_D53_4_1_1	46.509	1.067	10.886	0.113	7.344	0.12	6.934	13.442	1.504	5.614	1.086
P2-D53-4-1-mi1								0.170832	3.44987	11.4551	12.2904	13.1623	4.30824	0.999956	2.64762	5.21461	1.31184	8.50337	1.94131			0.170832	11.4551	13.1623	0.999956	5.21461	8.50337		5113.29	4.50272	5705.85	17.0184	3076.94	6219.69			48.528	P2_D53_4_1_1	46.509	1.067	10.886	0.113	7.344	0.12	6.934	13.442	1.504	5.614	1.086
P2-D53-4-1-ol@76	37.3	387.15	506.8	51.65	25031.2	8.12	15.72	0.00148739	7.2209e-05	0.015247	0.000265794	0.0200794	0.000286445	0.00206197	8.47362e-05	0.000333863	2.73409e-05	0.000640496	2.58837e-05	10		0.00148739	0.015247	0.0200794	0.00206197	0.000333863	0.000640496		-7.49903	0.00499771	7.25854	0.0434023	0.164276	0.390664			40.467	P2_D53_4_1_ol_average	40.467		0.021	0.0275	9.7875	0.17	49.0385	0.264
LM8-D57-4-4-mi1@77	20502.2	496696	429055	55759.1	56828	231690	250575	0.361044	0.0111435	8.88046	0.0596535	7.65465	0.042808	0.98176	0.00804393	4.10104	0.0181633	4.43689	0.0336358	7		0.361044	8.88046	7.65465	0.98176	4.10104	4.43689		16807.4	3.17161	3014.96	15.3151	2198.66	2948.65	Spot touching the bubble of MI		44.092	LM8_D57_4_4_average	44.092	1.1055	11.4635	0.0455	7.0945	0.155	7.18	11.1	1.342	4.883	0.6645
LM8-D57-4-4-mi1@78	8987.29	428634	381272	53460.6	51864.9	197269	203304	0.170115	0.00836005	8.29243	0.214186	7.41872	0.0689069	1.03509	0.0248888	3.82411	0.0538964	3.94688	0.0760017	10		0.170115	8.29243	7.41872	1.03509	3.82411	3.94688		4613.95	2.9616	2922.04	15.7337	2050.19	2623.01	Spot touching the bubble of MI		44.092	LM8_D57_4_4_average	44.092	1.1055	11.4635	0.0455	7.0945	0.155	7.18	11.1	1.342	4.883	0.6645
LM8-D57-4-4-mi1@79	3685.3	278545	269576	38383.7	30849.6	119896	131891	0.118573	0.00113809	9.05351	0.11083	8.78222	0.0854625	1.24647	0.0184365	3.8987	0.0459012	4.29503	0.053948	10		0.118573	9.05351	8.78222	1.24647	3.8987	4.29503		2594.07	3.23342	3459.09	16.9742	2090.19	2854.38			44.092	LM8_D57_4_4_average	44.092	1.1055	11.4635	0.0455	7.0945	0.155	7.18	11.1	1.342	4.883	0.6645
LM8-D57-4-4-mi1								0.118573	0.95982	8.67297	4.38767	8.10047	8.41621	1.14078	9.2647	3.8614	0.965905	4.12096	4.22409			0.118573	8.67297	8.10047	1.14078	3.8614	4.12096	average	2594.07	3.09751	3190.56	16.4376	2070.19	2738.69			44.092	LM8_D57_4_4_average	44.092	1.1055	11.4635	0.0455	7.0945	0.155	7.18	11.1	1.342	4.883	0.6645
LM8-D57-4-4-ol@80	99.28	634.65	522.85	78.3	38971.2	27.73	36.35	0.00256265	7.59465e-05	0.0162926	0.000279991	0.0134181	0.000145375	0.00202648	8.42742e-05	0.000712278	2.1298e-05	0.000939091	3.87567e-05	10		0.00256265	0.0162926	0.0134181	0.00202648	0.000712278	0.000939091	host	4.33596	0.00527879	4.79456	0.0421634	0.346429	0.566178			40	LM8_D57__4_4_ol_average	40.658		0.0355	0.0215	9.6145	0.166	49.0125	0.2705
SCL12-7-1-mi1@88	1921.3	31732.6	1.11056e+06	70231.6	61249.5	17931.6	274803	0.0312628	0.00239683	0.517402	0.00703375	18.8215	0.128706	1.147	0.00463093	0.292299	0.00366747	4.52052	0.0499307	10		0.0312628	0.517402	18.8215	1.147	0.292299	4.52052		483.059	0.219765	8816.55	19.5921	186.371	3572.89			52.438	SCL12_7_1_average	52.4525	1.181	17.825	0.013	6.4785	0.097	4.292	5.3475	3.508	8.0945	0.5135
SCL12-7-1-mi1@89	676.37	16646.2	601881	53280.2	39607.4	8777.95	149943	0.0176661	0.00102427	0.430571	0.0221683	15.7784	0.933683	1.36724	0.0485257	0.219756	0.00594305	3.73942	0.148798	10		0.0176661	0.430571	15.7784	1.36724	0.219756	3.73942		243.897	0.182884	7391.07	20.6728	140.117	2955.53			52.438	SCL12_7_1_average	52.4525	1.181	17.825	0.013	6.4785	0.097	4.292	5.3475	3.508	8.0945	0.5135
SCL12-7-1-mi1								0.0244644	27.7888	0.473986	9.15965	17.3	8.79513	1.25712	8.75957	0.256027	14.167	4.12997	9.45643			0.0244644	0.473986	17.3	1.25712	0.256027	4.12997	average	357.885	0.201325	8103.81	20.2404	163.244	3264.21			52.438	SCL12_7_1_average	52.4525	1.181	17.825	0.013	6.4785	0.097	4.292	5.3475	3.508	8.0945	0.5135
SCL12-7-1-ol@90	113.64	725.75	578.08	125.15	43276.4	26.77	44.45	0.00265326	9.96284e-05	0.0168819	0.000592928	0.0133945	0.000264594	0.00291329	9.83012e-05	0.000622767	2.64626e-05	0.00102548	1.8107e-05	10		0.00265326	0.0168819	0.0133945	0.00291329	0.000622767	0.00102548	host	4.9899	0.00512452	4.48405	0.0567726	0.283778	0.579243			37.4755	SCL12_7_1_ol-average	37.4755		0.0735	0.019	25.567	0.4505	36.035	0.3145
SCL14-D49-5-3-mi1@91	607.59	13297.6	548285	81091.4	79457.6	20983.2	251715	0.00767161	0.000187484	0.167685	0.00122845	7.03452	0.0367236	1.02262	0.00749077	0.263057	0.00326689	3.17649	0.0353452	10		0.00767161	0.167685	7.03452	1.02262	0.263057	3.17649		99.3074	0.0731939	3386.31	19.1145	172.365	2580.05			53.8884	SCL14_D49_5_3_M1_average	54.5223	1.079	18.933	0	6.051	0.101	3.19267	3.88433	3.234	9.372	0.499
SCL14-D49-5-3-mi1@92	414.74	11979.8	516234	73696.4	74297.1	23227.2	247178	0.005644	8.5176e-05	0.162499	0.00211006	7.10261	0.0757035	0.996141	0.00800472	0.310989	0.00330516	3.32311	0.0404754	10		0.005644	0.162499	7.10261	0.996141	0.310989	3.32311		71.637	0.0709302	3419.09	18.8609	203.772	2699.14			53.8884	SCL14_D49_5_3_M1_average	54.5223	1.079	18.933	0	6.051	0.101	3.19267	3.88433	3.234	9.372	0.499
SCL14-D49-5-3-mi1								0.0066578	15.2273	0.165092	1.57064	7.06856	0.481668	1.00938	1.31145	0.287023	8.34985	3.2498	2.25589			0.0066578	0.165092	7.06856	1.00938	0.287023	3.2498		85.3444	0.072062	3402.7	18.9893	188.069	2639.59			53.8884	SCL14_D49_5_3_M1_average	54.5223	1.079	18.933	0	6.051	0.101	3.19267	3.88433	3.234	9.372	0.499
SCL14-D49-5-3-mi2@93	497.81	11951.2	587427	76113.1	81766.3	36533.3	348919	0.00606497	1.68751e-05	0.145715	0.00230942	7.31086	0.0183298	0.930411	0.00209569	0.446227	0.0012804	4.31018	0.0190124	10		0.00606497	0.145715	7.31086	0.930411	0.446227	4.31018		74.4175	0.061234	3388.21	17.4987	281.491	3370.42			51.8804	SCL14_D49_5_3_M2_average	52.1513	1.18367	17.5873	0.00433333	7.566	0.145	4.35833	4.533	3.18367	8.61467	0.835667
SCL14-D49-5-3-mi2@94	489.2	11259	609600	72983.1	82871.4	49675.9	362260	0.00585909	3.25099e-05	0.135076	0.000397393	7.47963	0.0176641	0.87915	0.00494827	0.599466	0.00100258	4.42493	0.027644	10		0.00585909	0.135076	7.47963	0.87915	0.599466	4.42493		71.7469	0.0567632	3466.42	16.9316	378.158	3460.15			51.8804	SCL14_D49_5_3_M2_average	52.1513	1.18367	17.5873	0.00433333	7.566	0.145	4.35833	4.533	3.18367	8.61467	0.835667
SCL14-D49-5-3-mi2								0.00596203	1.72659	0.140396	3.78894	7.39525	1.14104	0.90478	2.83279	0.522846	14.6543	4.36755	1.31368			0.00596203	0.140396	7.39525	0.90478	0.522846	4.36755		73.081	0.0589986	3427.31	17.2209	329.824	3415.29			51.8804	SCL14_D49_5_3_M2_average	52.1513	1.18367	17.5873	0.00433333	7.566	0.145	4.35833	4.533	3.18367	8.61467	0.835667
SCL14-D49-5-3-ol@95	153.95	1138.47	988.15	155.5	75078.2	44.73	59.17	0.00204053	1.53077e-05	0.0151004	0.000146187	0.0131129	0.000115739	0.0020653	4.26021e-05	0.0005942	1.27859e-05	0.000786651	1.953e-05	10		0.00204053	0.0151004	0.0131129	0.0020653	0.0005942	0.000786651		-1.27454	0.00455567	4.3629	0.0400121	0.269102	0.441618			37.246	SCL14_D49_5_3_ol_average	37.246		0.06		27.1555	0.5235	34.7005	0.2715
SCL14-D49-5-4-mi1@99	333.31	13232.4	812390	90766.1	91341.1	24013.8	247096	0.0036433	2.38852e-05	0.144634	0.000432373	9.13201	0.0289909	0.993969	0.00923701	0.262187	0.0010708	2.71814	0.00655732	10		0.0036433	0.144634	9.13201	0.993969	0.262187	2.71814		45.1233	0.0628354	4375.35	18.751	170.988	2197.39			53.6351	SC14_D49_5_4_M1_average	54.01	1.037	17.607	0.002	6.1535	0.0825	4.2335	4.6825	3.081	9.077	0.4445
SCL14-D49-5-4-mi1@100	541.11	14729.1	882440	81711.2	99838.4	30380.1	284221	0.00541642	0.000154741	0.147315	0.000580212	9.09674	0.0834582	0.818575	0.00838136	0.303235	0.00571733	2.86166	0.0276759	7		0.00541642	0.147315	9.09674	0.818575	0.303235	2.86166		68.2727	0.0640002	4358.45	16.7498	197.758	2313.41			53.6351	SC14_D49_5_4_M1_average	54.01	1.037	17.607	0.002	6.1535	0.0825	4.2335	4.6825	3.081	9.077	0.4445
SCL14-D49-5-4-mi1								0.00452986	19.5715	0.145975	0.918311	9.11438	0.193518	0.906272	9.67668	0.282711	7.25971	2.7899	2.57208			0.00452986	0.145975	9.11438	0.906272	0.282711	2.7899		56.6007	0.0634178	4366.9	17.8204	184.373	2255.4			53.6351	SC14_D49_5_4_M1_average	54.01	1.037	17.607	0.002	6.1535	0.0825	4.2335	4.6825	3.081	9.077	0.4445
SCL14-D49-5-4-ol@101	120.16	1009.72	1292.22	219.72	76463.2	26.55	50.9	0.00155335	1.846e-05	0.0130896	0.000265556	0.0167838	0.000240199	0.00286009	3.84126e-05	0.000347027	1.34126e-05	0.00066618	1.43164e-05	10		0.00155335	0.0130896	0.0167838	0.00286009	0.000347027	0.00066618		-6.2349	0.00395149	5.58772	0.0554297	0.157259	0.374218			37.269	SCL14_D49_5_4_ol_average	37.269		0.0165		26.208	0.487	35.713	0.273
[truncated: 19 more columns]
