# Supplementary material for: Constraining the volatile evolution of mafic melts at Mt. Somma–Vesuvius, Italy, based on the composition of reheated melt inclusions and their olivine hosts
Source: Copernicus journal article supplement (doi:10.5194/ejm-35-921-2023), 2023-11-09
Supplement: Supplementary file 4 [file TableS4.xlsx]

## Sheet: ExampleOutput_vesuviusbubblebea
Appendix Table A4. Prediction of the CO2 contents of the bubble of MI using the software MIMiC (Rasmussen et al., 2020).
Sample	SIO2	TIO2	AL2O3	FE2O3	FEO	MNO	MGO	CAO	NA2O	K2O	P2O5	S	CL	H2O	CO2	SUM	CO2obsvol	CO2riker	CO2vbg	FO	TcCO2	TcMGO	Teqolv	Ti	OLV ADD	KD	Pglass	Dglass	Pobsvol	Dobsvol	VBvol riker	Priker	Driker	VBvol vbg	Pvbg	Dvbg	Tg	aMgO	Rmi	CR	Initial density		Error Messages		SIO2 1sig	TIO2 1sig	AL2O3 1sig	FE2O3 1sig	FEO 1sig
LFL2_D44_3_2_average	49.2896	0.97993	16.7368	2.09632	5.9419	0.189305	5.72993	10.434	1.87078	4.81057	0.812896	2425.33	4902.99	3.98653	1729.35	103.784	2710.51	1729.35	1729.35	85.38	1085.42	1195.95	1195.95	1091.98	-10.35	0.294441	369.297	13.8335	619.219	22.3856	0	369.297	13.8335	0	369.297	13.8335	527.206	35	35	97.3507	2483.72		['Tg outside VolatileCalc calibration [1]', 'Initial SiO2 outside VolatileCalc calibration [1]', 'No solution to bubble growth model found [1]']		2.48342	0.0584068	0.825092
LFL2_D44_1_1_average	50.1753	0.913394	15.2622	1.78933	6.26869	0.159313	7.7128	9.44194	1.83741	4.74752	0.807185	2066.82	4495.81	3.48364	1715.27	103.427	6568.98	1715.27	1973.84	87.97	1123.76	1215.22	1215.22	1155.61	-6.28	0.300022	408.906	15.1838	1002.66	35.5189	0	408.906	15.1838	0.111646	480.703	17.6444	545.014	20	20	327.741	2495.07		['Intermediate SiO2 outside VolatileCalc calibration [1]', 'Tg outside VolatileCalc calibration [1]', 'Initial SiO2 outside VolatileCalc calibration [1]']		2.73675	0.0517398	0.824441
P2_D53_4_4	48.5753	1.00335	11.0964	1.72662	6.28388	0.139078	9.07295	12.3084	1.90735	5.4439	1.12256	4568.71	5347.54	3.87431	3149.12	103.861	5267.66	3149.12	4847.7	89.63	1137.57	1183.29	1183.29	1198.11	0.68	0.297731	607.266	21.9755	811.172	28.9572	0	607.266	21.9755	0.656917	772.188	27.6269	531.35	25	25	330.041	2536.12		['Tg outside VolatileCalc calibration [1]']		2.52326	0.0528414	0.910515
P1_D49_2_7_average	49.0413	1.10935	13.84	1.84085	6.33372	0.118474	7.87346	10.0919	2.01406	5.83755	0.937024	2296.25	5117.01	4.10352	2385.64	104.121	5247.92	2385.64	2385.64	88.28	1173.12	1229.55	1229.55	1158.9	-7.66	0.294292	486.172	17.8345	905.625	32.198	0	486.172	17.8345	0	486.172	17.8345	533.809	29	29	337.028	2486.08		['Tg outside VolatileCalc calibration [1]', 'Initial SiO2 outside VolatileCalc calibration [1]', 'No solution to bubble growth model found [1]']		2.41797	0.046405	0.935738
P1_D50_1_8_M1_average	47.7914	1.16708	15.8342	2.19489	5.88506	0.190773	5.74036	10.515	2.23317	5.99252	1.07731	3380.05	4916.33	3.80424	2291.52	103.485	5707.94	2291.52	2291.52	86.06	1142.41	1209.03	1209.03	1100.28	-10.8	0.281637	333.906	12.6232	736.719	26.4166	0	333.906	12.6232	0	333.906	12.6232	531.498	32	32	174.49	2484.6		['Tg outside VolatileCalc calibration [1]', 'No solution to bubble growth model found [1]']		2.73523	0.0488645	0.818972
P1_D50_1_8_M6_average	47.9407	1.23019	15.5004	2.18986	5.89867	0.178937	5.85285	10.8592	2.05777	5.75953	1.11836	3528.41	5339.03	4.05963	2657.21	103.799	5330.29	2657.21	2657.21	86.08	1137.82	1204.48	1204.48	1100.54	-10.51	0.286098	386.953	14.4336	740.312	26.5366	0	386.953	14.4336	0	386.953	14.4336	529.77	34.5	34.5	165.277	2487.1		['Tg outside VolatileCalc calibration [1]', 'No solution to bubble growth model found [1]']		2.6507	0.0587643	0.869272
P2_D53_4_1	48.1359	1.04295	10.6738	1.59968	6.43582	0.122148	9.82647	13.1826	1.47517	5.50605	1.06175	2891.14	5844.3	4.22819	4804.17	104.644	-5925.67	4804.17	9823.56	89.93	1073.77	1143.7	1143.7	1220.5	6.64	0.304709	825.391	29.4474	0	0	0	825.391	29.4474	1.82947	1084.06	38.3096	539.708	15	15	740.815	2579.5		['Tg outside VolatileCalc calibration [1]']		2.74593	0.0628452	0.800213
LM8_D57_4_4_average	48.6762	1.17226	12.142	1.67131	6.51676	0.16202	9.96949	11.7607	1.42006	5.1751	0.705263	1972.83	2610.42	2.95448	2472.23	103.031	6535.4	2472.23	4994	90.09	1099.05	1169.97	1169.97	1228.25	5.04	0.299923	548.906	19.985	904.219	32.148	0	548.906	19.985	0.962857	761.797	27.2668	542.559	25.5	25.5	123.51	2584.51		['Intermediate SiO2 outside VolatileCalc calibration [1]', 'Tg outside VolatileCalc calibration [1]']		2.66073	0.0558304	0.959899
R6_D54_4_2_average	47.8106	1.16444	16.3845	1.81165	6.3681	0.113352	6.39179	10.1399	2.22582	5.54395	1.04078	2644.2	6197.27	3.76123	2348.45	103.875	4239.64	2348.45	3350.18	86.16	1028.27	1155.08	1155.08	1124.62	-3.18	0.287486	412.734	15.3138	617.344	22.3256	0	412.734	15.3138	0.499099	538.203	19.6149	495.878	76	76	12.0471	2504.95		['Tg outside VolatileCalc calibration [1]']		2.74949	0.0638556	0.828151
SCL14_D92_3_1_average	47.6571	1.20243	16.5727	1.81732	6.22568	0.156839	6.2986	10.2677	2.2062	5.54164	1.01423	2347.36	5309.52	3.29362	2424.73	103.262	4922.87	2424.73	3004.51	86.38	1063.52	1172.91	1172.91	1124.91	-4.6	0.284374	370.859	13.8835	631.328	22.8057	0	370.859	13.8835	0.276257	464.766	17.1043	526.036	32.5	32.5	65.419	2514.85		['Tg outside VolatileCalc calibration [1]']		2.60005	0.060621	0.850391
[truncated: 71 more columns]
