# Supplementary material for: Constraining the volatile evolution of mafic melts at Mt. Somma–Vesuvius, Italy, based on the composition of reheated melt inclusions and their olivine hosts
Source: Copernicus journal article supplement (doi:10.5194/ejm-35-921-2023), 2023-11-09
Supplement: Supplementary file 5 [file TableS5.xlsx]

## Sheet: H2O correction and MafiCH press
Units		wt%								µm	ppm	mole%	ppm			wt%											MPa		molar fraction	km		MPa		molar fraction	km
MI ID	type of reheated MI	H2O	*$H2O-loss during heating experiment	H2O-correction after experiment	*H2O-loss post-eruption	H2O-correction after post eruption diffusion	*H2O concentration of the bubble	H2O after H-loss and bubble	H2O-correction after PEC and H-loss	average diameter MI	CO2 restored	Fo host	F	S	Cl	SiO2	TiO2	Al2O3	FeO	MnO	MgO	CaO	Na2O	K2O	P2O5	Cr2O3	P H2O-CO2 corrected (Mafic)	error bubble content	xH2O (fluid)	depths	depth assuming 260 bar/km	P H2O-CO2 corrected MagmaSat	error bubble content	xH2O (fluid)	depths	depth assuming 260 bar/km
SCL14_D92_3_1	bubble-bearing	3.2789	0.0264516	3.30535	1.03446	4.33981	0.00867076	4.34849	4.53112	65	3606	86.38	2821	2245	5078	48.108	1.209	16.658	8.167	0.158	6.52	10.32	2.218	5.57	1.019	0.053	456.3	±46	0.311	16.9	17.55	430.654	±45	0.519	15.9501	16.5636
LFL2_D44_3_2	bubble-bearing	3.93655	0.00502983	3.94158	0	3.94158	0.0100925	3.95167	4.35079	70	2263	85.38	3292	2178	4403	49.713	0.978	16.667	8.136	0.187	6.454	10.389	1.869	4.793	0.814	0	371.8	±5	0.376	13.7704	14.3	380.068	±5	0.549	14.0766	14.618
LM8_D57_4_4	bubble-bearing	2.99839	0	2.99839	0	2.99839	0.00842325	3.00681	2.91059	51	2934	90.09	3191	2070	2739	49.106	1.199	12.424	8.178	0.166	9.374	12.034	1.453	5.295	0.722	0.049	245.8	±12	0.292	9.1037	9.45385	298.064	±18	0.367	11.0394	11.464
LFL2_D44_1_1	bubble-bearing	3.45995	0.0173869	3.47733	0	3.47733	0.0122013	3.48954	3.68146	40	3094	87.97	2392	1946	4233	50.563	0.914	15.268	8.143	0.159	8.082	9.445	1.838	4.749	0.807	0.032	407.6	±77	0.246	15.0963	15.6769	389.462	±66	0.471	14.4245	14.9793
SCL12_7_1	bubble-free	0.21421	0.163002	0.377211	0.139138	0.516349	0	0.516349	0.549396	43.5	380.789	71.53	8104	163	3264	53.224	1.256	18.971	6.338	0.106	1.506	5.696	3.737	8.612	0.543	0.011	37.9		0.093	1.4037	1.45769	56.7		0.083	2.1	2.18077
SCL14_D49_5_3_M1	bubble-free	0.0746563	0.0264516	0.101108	0.415241	0.516349	0	0.516349	0.534938	49.5	88.4168	69.5	3403	188	2640	54.389	1.111	19.42	6.286	0.104	1.263	3.986	3.321	9.611	0.509	0	11.8		0.279	0.437037	0.453846	18.2		0.2	0.674074	0.7
SCL14_D49_5_3_M2	bubble-free	0.0647215	0.0264516	0.0911731	0.425176	0.516349	0	0.516349	0.534938	28.5	80.1698	69.5	3427	330	3415	53.316	1.296	19.222	6.031	0.154	1.22	4.954	3.482	9.413	0.912	0	10.4		0.317	0.385185	0.4	15.86		0.257	0.587407	0.61
P2_D53_4_4	bubble-bearing	3.92171	0	3.92171	0	3.92171	0.043278	3.96499	3.98481	50	4022	89.63	5455	4599	5383	49.267	1.028	11.369	8.188	0.142	8.642	12.611	1.954	5.578	1.15	0.071	224.8	±6	0.571	8.32593	8.64615	350	±11	0.474	12.963	13.4615
P1_D50_2_1	bubble-free	0.173323	0.0879666	0.261289	0	0.261289	0	0.261289	0.274615	35	87.6888	76.11	3537	175	2377	51.506	1.336	17.968	7.772	0.116	2.796	7.175	3.114	7.091	1.115	0.011	10.3		0.093	0.381481	0.396154	13.62		0.087	0.504444	0.523846
SCL12_3_3_MS	bubble-free	0.190246	0.0498611	0.240107	0.276242	0.516349	0	0.516349	0.551461	61	45.3962	71.19	3750	172	2536	52.827	1.401	19.166	6.474	0.096	1.651	6.075	3.615	7.54	1.134	0.021	10.2		0.345	0.377778	0.392308	11.398		0.361	0.422148	0.438385
P1_D49_2_5	bubble-free	0.149911	0.045278	0.195189	0	0.195189	0	0.195189	0.208267	62	95.6778	75.6	3717	156	1970	51.833	1.238	18.159	7.402	0.139	2.526	6.722	3.126	7.543	1.28	0.032	10.5		0.058	0.388889	0.403846	15.579		0.044	0.577	0.599192
R6_D54_4_2	bubble-bearing	3.78068	0.00853228	3.78921	0	3.78921	0.00751776	3.79673	3.92961	152	2973	86.16	3040	2566	6014	48.334	1.179	16.593	8.156	0.115	6.389	10.269	2.254	5.615	1.054	0.042	378.2	±23	0.305	14.0074	14.5462	373.119	±23	0.476	13.8192	14.3507
P1_D50_1_4	bubble-free	0.456985	0.0593639	0.516349	0	0.516349	0	0.516349	0.534938	52.5	176.561	73.25	4122	247	2692	52.239	1.235	19.084	7.136	0.145	2.012	5.645	3.466	7.845	1.193	0	24		0.137	0.888889	0.923077	30.7		0.143	1.13704	1.18077
P1_D49_2_7	bubble-bearing	4.14323	0.0198818	4.16312	0	4.16312	0.0132928	4.17641	4.54393	58	2826	88.28	3743	2132	4751	49.622	1.128	14.074	8.17	0.12	7.68	10.263	2.048	5.936	0.953	0.011	306.1	±11	0.513	11.337	11.7731	360.8	±13	0.571	13.363	13.8769
P1_D50_1_8_M1	bubble-bearing	3.78492	0.0113741	3.7963	0	3.7963	0.012574	3.80887	4.25832	64	3269	86.06	3852	3012	4381	48.355	1.173	15.92	8.169	0.192	6.221	10.572	2.245	6.025	1.083	0.045	363.7	±39	0.433	13.4704	13.9885	376.73	±37	0.513	13.953	14.4896
P1_D50_1_8_M6	bubble-bearing	4.13704	0.0124574	4.1495	0	4.1495	0.0111806	4.16068	4.635	69	3467	86.08	3816	3155	4774	48.543	1.238	15.596	8.169	0.18	6.347	10.926	2.07	5.795	1.125	0.011	390.8	±31	0.396	14.4741	15.0308	414.08	±31	0.541	15.3363	15.9262
SCL14_D49_5_4_M1	bubble-free	0.0670326	0.0640183	0.131051	0.385298	0.516349	0	0.516349	0.545781	58.5	60.249	70.84	4367	184	2255	54.381	1.09	18.513	6.335	0.085	1.421	4.922	3.239	9.548	0.466	0	6.9		0.51	0.255556	0.265385	12.75		0.494	0.472222	0.490385
P2_D53_4_1	bubble-bearing	4.31811	0.0217085	4.33981	0	4.33981	0.0361139	4.37593	4.19652	30	5884	90	5706	3077	6220	48.682	1.076	11.011	8.198	0.126	8.896	13.598	1.522	5.68	1.095	0.116	303.6	±8	0.449	11.2444	11.6769	427.03	±11	0.447	15.8159	16.4242
Marianelli et al. (2005), Marianelli et al. (1999) and Marianelli et al. (1995)									H2O-correction after PEC		CO2 PEC-corrected	Fo host				SiO2	TiO2	Al2O3	FeO	MnO	MgO	CaO	Na2O	K2O	P2O5	Cr2O3	P bars H2O-CO2 corrected (Mafic)		xH2O (fluid)	depths (km)	depth assuming 260 bar/km
Vs98a_56		3.47							3.34161		1697.77	89.5				50.165	1.076	12.347	8.01501	0.082	9.102	11.497	1.476	5.093	0.963	0.031	1871		0.5	6.92963	7.19615
MI6		2.38							2.3562		2646.27	89.1				49.741	0.967	11.893	8.02315	0.125	8.237	12.256	2.006	5.645	0.904	0.031	1401		0.36	5.18889	5.38846
Vs98a_56		3.87							3.80421		2243.21	89.7				48.695	1.178	12.431	8.02346	0.137	9.083	13.083	1.409	4.848	0.926	0.032	2547		0.457	9.43333	9.79615
MI11a		4.39							4.20562		2322.19	90.1				50.79	0.798	11.37	8.017	0.112	9.792	12.034	1.513	4.581	0.808	0.031	2470		0.571	9.14815	9.5
Vs98a_56		4.05							3.94065		2552.18	88.3				50.886	0.96	12.634	8.01295	0.115	8.181	11.778	1.607	4.914	0.73	0.031	2426		0.516	8.98519	9.33077
MI18		3.31							3.19084		1882.69	90.1				50.597	0.997	11.465	8.01919	0.103	9.773	11.886	1.459	4.674	0.842	0.031	1905		0.455	7.05556	7.32692
Vs98a_52		3.85							3.8731		2222.25	88.2				48.703	1.132	13.946	8.00997	0.097	7.917	12.556	1.627	4.85	0.981	0.032	2767		0.431	10.2481	10.6423
MI2		3.83							3.73042		1831.12	89.6				50.072	0.94	12.617	8.0154	0.124	9.196	11.419	1.569	4.977	0.888	0.031	2147		0.533	7.95185	8.25769
Vs98a_52		3.46							3.38042		1724.4	88.4				50.241	0.99	12.721	8.03858	0.115	8.164	11.793	1.584	5.23	0.938	0.031	1748		0.554	6.47407	6.72308
MI4		3.72							3.67164		1730.21	89.7				49.656	0.996	12.632	8.01651	0.145	9.28	11.844	1.649	4.657	0.944	0.031	2155		0.515	7.98148	8.28846
Vs98a_52		3.11							3.03536		1634.8	89.9				49.438	1.13	12.699	8.01557	0.135	9.428	11.725	1.493	4.872	0.881	0.031	1716		0.465	6.35556	6.6
MI8		2.79							2.72025		1584.38	90.1				50.277	0.868	12.334	8.02296	0.155	9.82	11.466	1.52	4.59	0.765	0.031	1651		0.395	6.11481	6.35
VS1906		3							2.898		1738.8	89.9				49.87	1.009	12.471	8.01487	0.133	9.497	11.767	1.581	4.65	0.826	0.031	1877		0.388	6.95185	7.21923
VS1906		3.2							3.2224		1711.9	86.9				48.783	1.252	15.007	8.00158	0.149	6.89	11.069	1.847	5.699	1.114	0.032	2164		0.404	8.01481	8.32308
VS97-109		2.9							2.8101		2422.5	87.9				49.809	1.004	13.812	8.02021	0.174	7.745	11.486	1.783	5.133	0.85	0.031	2144		0.318	7.94074	8.24615
VS97-109		2.5							2.4675		2072.7	86.9				48.648	1.052	15.291	8.09853	0.115	6.888	11.103	2.042	5.687	0.885	0.031	2243		0.239	8.30741	8.62692
Vs00_30		2.13							2.15982		1868.8	86.6				47.088	1.147	15.894	8.00622	0.106	6.58	12.592	1.539	5.914	0.945	0.032	2290		0.183	8.48148	8.80769
VS97-109		2.3							2.2908		1892.4	86.1				49.455	1.099	15.108	8.02395	0.136	6.476	10.787	1.998	5.744	0.983	0.031	1952		0.242	7.22963	7.50769
Vs00_30		2.95							2.99425		3003.38	85.9				49.434	0.888	15.436	8.00679	0.148	6.405	11.175	2.019	5.54	0.761	0.032	3167		0.23	11.7296	12.1808
MI2		1.78							1.82984		970.432	84.5				46.314	1.193	17.72	8.01101	0.137	5.319	11.331	2.239	6.347	1.183	0.032	1536		0.206	5.68889	5.90769
VS97-109		3.4							3.502		3193	83.8				48.908	1.135	16.384	7.99953	0.162	5.336	10.836	1.871	6.261	0.908	0.032	3459		0.276	12.8111	13.3038
VS97-109		3.2							3.2096		3510.5	83				49.601	1.069	16.541	8.00109	0.148	4.705	9.017	2.466	7.27	0.963	0.032	3506		0.232
*wt% relative to the total MI mass
$From H-diffusive experiments worksheet column L
SAMP_NO		CORR_COEF for PEC
LFL2_D44_3_2_average		1.101
LFL1_D38_2_10_M1_average		1.022
LFL1_D38_2_10_M2		1.003
LFL2_D44_4_1_average		1.073
LFL2_D44_1_1_average		1.055
P2_D53_4_4		1.005
P1_D50_2_1_average		1.051
P1_D49_2_5_average		1.067
P1_D50_1_4_average		1.036
P1_D49_2_7_average		1.088
P1_D50_1_8_M1_average		1.118
P1_D50_1_8_M6_average		1.114
P2_D53_3_6_average		1.008
P2_D53_4_1		0.959
LM8_D57_4_4_average		0.968
R6_D54_4_2_average		1.035
SCL12_7_1_average		1.064
SCL14_D49_5_3_M1_average		1.036
SCL14_D49_5_3_M2_average		1.097
SCL14_D92_3_1_average		1.042
SCL12_3_3_MS_average		1.068
SCL14_D49_5_4_M1_average		1.057
SCL14_6_2_average		1.106
SCL14_5_9_average		1.093
Vs98a_56		0.963
MI6		0.99
Vs98a_56		0.983
MI11a		0.958
Vs98a_56		0.973
MI18		0.964
Vs98a_52		1.006
MI2		0.974
Vs98a_52		0.977
MI4		0.987
Vs98a_52		0.976
MI8		0.975
VS1906		0.966
VS1906		1.007
VSV19 O11		0.968
VSV19 O13		0.98
VSV19 O15-6		0.975
VSV19 O18		0.995
VSV19 O112		1.015
VSV19 O113		1.046
VSN928 O14		0.959
VS97-109		0.969
VSN928 Ol10		0.96
VS97-109		0.987
Vs00_30		1.014
VSN928 O11		1.017
VS97-109		0.996
Vs00_30		1.015
VSN928 Oll		1.004
VSN928 O16		1.023
MI2		1.028
VS97-109		1.03
VS97-109		1.003

## Sheet: H-diffusive experiments
H-diffusive reequilibration during heating experiments					µm					wt%
	MI ID	Tquenching	D fo (cm2/s)	Kol	MI diameter	host radius	τ	MI radius	α	re-equilibration %	H2O-loss durin heating experiment	H2O MI	H2O restored
Fo-rich MI	LFL2_D44_3_2_average	1200	9.7796e-11	0.001	70	0.001	0.0528098	35	0.035	0.127498	0.00502983	3.94	3.94503
Fo-rich MI	LFL2_D44_1_1_average	1228	1.19207e-10	0.001	40	0.001	0.0643719	20	0.02	0.5	0.0173869	3.46	3.47739
Fo-rich MI	P2_D53_4_4	1143	6.37943e-11	0.001	50	0.001	0.0344489	25	0.025	0	0	3.92	3.92
Fo-rich MI	P1_D49_2_7_average	1229	1.20037e-10	0.001	58	0.001	0.0648198	29	0.029	0.477941	0.0198818	4.14	4.15988
Fo-rich MI	P1_D50_1_8_M1_average	1218	1.11164e-10	0.001	64	0.001	0.0600288	32	0.032	0.3	0.0113741	3.78	3.79137
Fo-rich MI	P1_D50_1_8_M6_average	1218	1.11164e-10	0.001	69	0.001	0.0600288	34.5	0.0345	0.3	0.0124574	4.14	4.15246
Fo-rich MI	P2_D53_4_1	1160	7.27214e-11	0.001	30	0.001	0.0392696	15	0.015	0.5	0.0217085	4.32	4.34171
Fo-rich MI	LM8_D57_4_4_average	1155	6.9996e-11	0.001	51	0.001	0.0377979	25.5	0.0255	0.00015	4.50001e-06	3	3
Fo-rich MI	R6_D54_4_2_average	1154	6.94611e-11	0.001	152	0.001	0.037509	76	0.076	0.225213	0.00853228	3.78	3.78853
Fo-rich MI	SCL14_D92_3_1_average	1244	1.33048e-10	0.001	65	0.001	0.0718462	32.5	0.0325	0.8	0.0264516	3.28	3.30645
Fo-poor MI	SCL14-D49-5-3-M1	1198	3.6441e-10	0.001	50	0.001	0.196782	25	0.025	21.0806	0.0186981	0.07	0.0886981
Fo-poor MI	SCL14-D49-5-3-M2	1198	3.6441e-10	0.001	29	0.001	0.196782	14.5	0.0145	61.5655	0.0961096	0.06	0.15611
Fo-poor MI	SCL12-7-1	1213	4.04007e-10	0.001	44	0.001	0.218164	22	0.022	43.7	0.163002	0.21	0.373002
Fo-poor MI	SCL12-3-3-MS	1197	3.61886e-10	0.001	61	0.001	0.195418	30.5	0.0305	20.7875	0.0498611	0.19	0.239861
Fo-poor MI	SCL14-D49-5-4-M1	1272	5.94503e-10	0.001	59	0.001	0.321032	29.5	0.0295	47.7683	0.0640183	0.07	0.134018
Fo-poor MI	P1-D50-2-1	1190	3.44606e-10	0.001	35	0.001	0.186087	17.5	0.0175	34.1	0.0879666	0.17	0.257967
Fo-poor MI	P1D49-2-5	1208	3.82481e-10	0.001	62	0.001	0.20654	31	0.031	23.1864	0.045278	0.15	0.195278
Fo-poor MI	P1-D50-1-4	1142	2.43195e-10	0.001	53	0.001	0.131325	26.5	0.0265	11.4301	0.0593639	0.46	0.519364
density oli	density ratio 1.2
density melt
