# Supplementary material for: Constraining the volatile evolution of mafic melts at Mt. Somma–Vesuvius, Italy, based on the composition of reheated melt inclusions and their olivine hosts
Source: Copernicus journal article supplement (doi:10.5194/ejm-35-921-2023), 2023-11-09
Supplement: Supplementary file 6 [file TableS6.xlsx]

## Sheet: Petrolog Parameter
****************** New calculation ********************
Modelling Crystallisation
Minerals chosen for calculations are:
Olv	Plg	Cpx
The model used for Olv is: Ford et al.	1983
Olv fractionation is: 100	0
The model used for Plg is: Ariskin et al.	1993
Plg fractionation is: 100	0
The model used for Cpx is: Ariskin et al.	1993
Cpx fractionation is: 100	0
Fe2O3 in the melt is calculated using QFM buffer of oxygen fugacity
f(O2) is calculated following the model of Borisov and Shapkin	1990
Initial Pressure = 1 kbar
During calculations Pressure is changed at 20 % crystallisation to 0.3 kbars
at 20 % crystallisation to 0.03 kbars
at 50 % crystallisation to 0.01 kbars
Melt density is calculated following the model of Lange & Carmichael 1987
Melt viscosity is calculated following the model of Bottinga & Weill 1972
Parameters to stop calculations at:
Final degree of fractionation: 50 %
The amount of a mineral phase which will be extracted from
100% of melt on each step is: 0	0.01

## Sheet: Sheet1
SiO2_magma	TiO2_magma	Al2O3_magma	Fe2O3_magma	FeO_magma	MnO_magma	MgO_magma	CaO_magma	Na2O_magma	K2O_magma	P2O5_magma	Cr2O3_magma	H2O_magma	SiO2_melt	TiO2_melt	Al2O3_melt	Fe2O3_melt	FeO_melt	MnO_melt	MgO_melt	CaO_melt	Na2O_melt	K2O_melt	P2O5_melt	Cr2O3_melt	H2O_melt	SiO2_cumulate	TiO2_cumulate	Al2O3_cumulate	Fe2O3_cumulate	FeO_cumulate	MnO_cumulate	MgO_cumulate	CaO_cumulate	Na2O_cumulate	K2O_cumulate	P2O5_cumulate	Cr2O3_cumulate	H2O_cumulate	Temperature	Temperature_Olv	Temperature_Plg	Temperature_Cpx	Olv_Fo _magma	Olv_Kd	Plg_An _magma	Cpx_Mg#Cpx_magma	Olv_Fo _cumulate	Plg_An _cumulate	Cpx_Mg#Cpx_cumulate
46.6376	0.9986	16.1515	1.2152	6.8257	0.1551	6.3164	10.005	2.1522	5.4	0.9889	0.0485	3.1052	46.6376	0.9986	16.1515	1.2152	6.8257	0.1551	6.3164	10.005	2.1522	5.4	0.9889	0.0485	3.1052	40.0603	0	0	0	14.1125	0	45.8272	0	0	0	0	0	0	1204.1	1204.1	1111.92	1151.94	85.27	0.285	-1	-1	85.27	-1	-1
46.7323	1.0079	16.3026	1.2261	6.7672	0.1566	5.986	10.0986	2.1724	5.4505	0.9981	0.0489	3.0526	46.7323	1.0079	16.3026	1.2261	6.7672	0.1566	5.986	10.0986	2.1724	5.4505	0.9981	0.0489	3.0526	40.0099	0	0	0	14.3815	0	45.6086	0	0	0	0	0	0	1191.38	1191.38	1115.99	1146.98	84.66	0.286	-1	-1	84.97	-1	-1
46.8348	1.0182	16.4685	1.2399	6.6948	0.1582	5.6252	10.2014	2.1945	5.506	1.0083	0.0494	3.0012	46.8348	1.0182	16.4685	1.2399	6.6948	0.1582	5.6252	10.2014	2.1945	5.506	1.0083	0.0494	3.0012	39.9519	0	0	0	14.6907	0	45.3574	0	0	0	0	0	0	1176.89	1176.89	1120.59	1141.35	83.94	0.287	-1	-1	84.63	-1	-1
46.9398	1.0286	16.6376	1.256	6.6125	0.1598	5.2618	10.3061	2.217	5.5625	1.0186	0.0499	2.9501	46.9398	1.0286	16.6376	1.256	6.6125	0.1598	5.2618	10.3061	2.217	5.5625	1.0186	0.0499	2.9501	39.8902	0	0	0	15.0198	0	45.09	0	0	0	0	0	0	1161.57	1161.57	1125.37	1135.42	83.14	0.288	-1	-1	84.26	-1	-1
47.0488	1.0394	16.8118	1.2748	6.5184	0.1615	4.8926	10.414	2.2402	5.6207	1.0293	0.0505	2.8991	47.0488	1.0394	16.8118	1.2748	6.5184	0.1615	4.8926	10.414	2.2402	5.6207	1.0293	0.0505	2.8991	39.8236	0	0	0	15.3751	0	44.8013	0	0	0	0	0	0	1145.16	1145.16	1130.41	1129.09	82.24	0.289	-1	-1	83.86	-1	-1
47.1226	1.0467	16.9273	1.2889	6.4501	0.1626	4.6483	10.4861	2.2558	5.6605	1.0366	0.0508	2.8653	47.1226	1.0467	16.9273	1.2889	6.4501	0.1626	4.6483	10.4861	2.2558	5.6605	1.0366	0.0508	2.8653	39.7989	0	0.0728	0	15.5885	0	44.499	0.0341	0.0066	0	0	0	0	1133.78	1133.79	1133.78	1124.71	81.58	0.29	73.99	-1	83.58	73.99	-1
47.1394	1.0503	16.9169	1.2964	6.4518	0.1632	4.6209	10.49	2.2572	5.6797	1.0401	0.051	2.8448	47.1394	1.0503	16.9169	1.2964	6.4518	0.1632	4.6209	10.49	2.2572	5.6797	1.0401	0.051	2.8448	40.2225	0	1.495	0	14.9395	0	42.5078	0.6989	0.1364	0	0	0	0	1132.57	1132.57	1132.8	1124.28	81.49	0.29	73.81	-1	83.53	73.9	-1
47.1881	1.0614	16.8754	1.3201	6.4616	0.1649	4.5488	10.4982	2.2606	5.7399	1.0511	0.0515	2.7811	47.1881	1.0614	16.8754	1.3201	6.4616	0.1649	4.5488	10.4982	2.2606	5.7399	1.0511	0.0515	2.7811	41.2996	0	5.0606	0	13.3026	0	37.5092	2.3601	0.4679	0	0	0	0	1129.4	1129.39	1129.4	1123.18	81.22	0.29	73.2	-1	83.41	73.6	-1
47.2379	1.0729	16.8346	1.3451	6.4699	0.1667	4.4732	10.5082	2.2638	5.802	1.0625	0.0521	2.7152	47.2379	1.0729	16.8346	1.3451	6.4699	0.1667	4.4732	10.5082	2.2638	5.802	1.0625	0.0521	2.7152	42.0826	0	7.598	0	12.1451	0	33.9274	3.5348	0.712	0	0	0	0	1125.97	1125.99	1125.97	1122.02	80.93	0.291	72.56	-1	83.28	73.29	-1
47.2874	1.0845	16.7942	1.3709	6.477	0.1685	4.3973	10.5192	2.2665	5.8647	1.074	0.0526	2.6484	47.2874	1.0845	16.7942	1.3709	6.477	0.1685	4.3973	10.5192	2.2665	5.8647	1.074	0.0526	2.6484	42.6751	0	9.4687	0	11.2968	0	31.2659	4.3942	0.8994	0	0	0	0	1122.53	1122.53	1122.53	1120.84	80.63	0.291	71.91	-1	83.15	72.97	-1
47.3248	1.0936	16.7642	1.3914	6.482	0.1699	4.339	10.527	2.2684	5.9138	1.083	0.0531	2.5959	47.3248	1.0936	16.7642	1.3914	6.482	0.1699	4.339	10.527	2.2684	5.9138	1.083	0.0531	2.5959	43.0539	0	10.5969	0	10.7802	0	29.6214	4.9311	1.0165	0	0	0	0	1119.91	1119.85	1119.87	1119.91	80.4	0.291	71.4	78.37	83.05	72.73	78.37
47.3288	1.0965	16.776	1.3966	6.4852	0.1703	4.3243	10.5099	2.2718	5.9295	1.0858	0.0532	2.5782	47.3288	1.0965	16.776	1.3966	6.4852	0.1703	4.3243	10.5099	2.2718	5.9295	1.0858	0.0532	2.5782	43.2534	0	10.6765	0	10.6326	0	29.1198	5.2994	1.0183	0	0	0	0	1119.43	1119.38	1119.39	1119.43	80.37	0.29	71.32	78.28	83.05	72.69	78.32
47.3465	1.1086	16.8243	1.4189	6.497	0.1722	4.2619	10.4411	2.2858	5.9953	1.0979	0.0538	2.5037	47.3465	1.1086	16.8243	1.4189	6.497	0.1722	4.2619	10.4411	2.2858	5.9953	1.0979	0.0538	2.5037	43.9674	0	10.9771	0	10.1075	0	27.3119	6.6086	1.0276	0	0	0	0	1117.42	1117.34	1117.39	1117.42	80.1	0.291	70.96	77.91	83.02	72.53	78.14
47.3632	1.1211	16.8745	1.4418	6.5091	0.1741	4.2009	10.3687	2.3001	6.0624	1.1102	0.0544	2.4273	47.3632	1.1211	16.8745	1.4418	6.5091	0.1741	4.2009	10.3687	2.3001	6.0624	1.1102	0.0544	2.4273	44.5653	0	11.2153	0	9.6778	0	25.8082	7.6978	1.0355	0	0	0	0	1115.34	1115.39	1115.34	1115.4	79.89	0.29	70.6	77.54	83	72.37	77.96
47.3815	1.1339	16.9263	1.466	6.5192	0.1761	4.1364	10.2969	2.3146	6.1317	1.1229	0.055	2.3483	47.3815	1.1339	16.9263	1.466	6.5192	0.1761	4.1364	10.2969	2.3146	6.1317	1.1229	0.055	2.3483	45.0604	0	11.4158	0	9.3313	0	24.558	8.5903	1.0442	0	0	0	0	1113.29	1113.26	1113.27	1113.29	79.62	0.29	70.22	77.14	82.98	72.2	77.76
47.4	1.1468	16.9793	1.4908	6.5281	0.1781	4.0716	10.2249	2.3291	6.2018	1.1357	0.0557	2.2677	47.4	1.1468	16.9793	1.4908	6.5281	0.1781	4.0716	10.2249	2.3291	6.2018	1.1357	0.0557	2.2677	45.4765	0	11.5804	0	9.0488	0	23.5085	9.3332	1.0526	0	0	0	0	1111.17	1111.09	1111.2	1111.17	79.33	0.29	69.84	76.74	82.95	72.03	77.57
47.4177	1.1602	17.0331	1.5166	6.5377	0.1802	4.0087	10.1491	2.3438	6.2741	1.1489	0.0563	2.1841	47.4177	1.1602	17.0331	1.5166	6.5377	0.1802	4.0087	10.1491	2.3438	6.2741	1.1489	0.0563	2.1841	45.847	0	11.7288	0	8.8015	0	22.575	9.9859	1.0618	0	0	0	0	1109.04	1109.04	1109.02	1109.04	79.1	0.289	69.44	76.34	82.93	71.85	77.37
47.4373	1.1739	17.0873	1.5436	6.5452	0.1823	3.9433	10.0751	2.3584	6.348	1.1625	0.057	2.0977	47.4373	1.1739	17.0873	1.5436	6.5452	0.1823	3.9433	10.0751	2.3584	6.348	1.1625	0.057	2.0977	46.1614	0	11.8627	0	8.5981	0	21.7754	10.5303	1.0722	0	0	0	0	1106.81	1106.83	1106.81	1106.87	78.81	0.289	69.02	75.91	82.9	71.67	77.18
47.4573	1.1878	17.1442	1.5715	6.5512	0.1845	3.8767	9.9997	2.3733	6.4236	1.1763	0.0577	2.0087	47.4573	1.1878	17.1442	1.5715	6.5512	0.1845	3.8767	9.9997	2.3733	6.4236	1.1763	0.0577	2.0087	46.438	0	11.9713	0	8.4284	0	21.0764	11.0043	1.0816	0	0	0	0	1104.63	1104.55	1104.6	1104.63	78.5	0.289	68.61	75.47	82.86	71.49	76.97
47.4768	1.2021	17.2036	1.6004	6.5571	0.1867	3.8115	9.921	2.3885	6.5009	1.1905	0.0584	1.9162	47.4768	1.2021	17.2036	1.6004	6.5571	0.1867	3.8115	9.921	2.3885	6.5009	1.1905	0.0584	1.9162	46.6903	0	12.0617	0	8.2801	0	20.4456	11.432	1.0902	0	0	0	0	1102.38	1102.36	1102.35	1102.38	78.26	0.288	68.18	75.03	82.84	71.3	76.76
47.4985	1.2168	17.2637	1.6306	6.5607	0.189	3.7438	9.8441	2.4036	6.58	1.2049	0.0591	1.8201	47.4985	1.2168	17.2637	1.6306	6.5607	0.189	3.7438	9.8441	2.4036	6.58	1.2049	0.0591	1.8201	46.9095	0	12.1462	0	8.1577	0	19.8917	11.7949	1.1	0	0	0	0	1100.07	1100	1100.07	1100.07	77.93	0.288	67.74	74.57	82.8	71.11	76.55
47.5202	1.2319	17.3253	1.662	6.5647	0.1914	3.6781	9.7635	2.419	6.6616	1.2199	0.0598	1.7191	47.5202	1.2319	17.3253	1.662	6.5647	0.1914	3.6781	9.7635	2.419	6.6616	1.2199	0.0598	1.7191	47.1147	0	12.2259	0	8.046	0	19.3745	12.1286	1.1103	0	0	0	0	1097.68	1097.76	1097.68	1097.76	77.67	0.287	67.28	74.1	82.78	70.91	76.33
47.5443	1.2472	17.3891	1.6946	6.5656	0.1937	3.6095	9.6851	2.4344	6.7444	1.2351	0.0605	1.6142	47.5443	1.2472	17.3891	1.6946	6.5656	0.1937	3.6095	9.6851	2.4344	6.7444	1.2351	0.0605	1.6142	47.2932	0	12.2925	0	7.9578	0	18.9236	12.4126	1.1203	0	0	0	0	1095.37	1095.32	1095.34	1095.37	77.34	0.287	66.82	73.61	82.74	70.71	76.12
47.5449	1.2473	17.3907	1.6949	6.5655	0.1938	3.6086	9.6841	2.4347	6.7452	1.2352	0.0605	1.6122	47.5449	1.2473	17.3907	1.6949	6.5655	0.1938	3.6086	9.6841	2.4347	6.7452	1.2352	0.0605	1.6122	47.295	0	12.289	0	7.9582	0	18.9214	12.4167	1.1198	0	0	0	0	1095.33	1095.28	1095.34	1095.33	-1	-1	-1	73.6	82.74	70.71	76.11
48.1046	1.2654	17.5845	1.7246	6.6425	0.1966	3.6363	9.7928	2.463	6.8428	1.2531	0.0614	0.4509	48.1046	1.2654	17.5845	1.7246	6.6425	0.1966	3.6363	9.7928	2.463	6.8428	1.2531	0.0614	0.4509	47.3134	0	12.3992	0	7.9257	0	18.8132	12.4119	1.1367	0	0	0	0	1093.33	1093.37	1093.33	1093.2	77.27	0.287	66.7	73.52	82.7	70.62	76.1
48.1216	1.2659	17.5922	1.7257	6.643	0.1966	3.6338	9.7971	2.4641	6.8458	1.2536	0.0615	0.4175	48.1216	1.2659	17.5922	1.7257	6.643	0.1966	3.6338	9.7971	2.4641	6.8458	1.2536	0.0615	0.4175	47.3097	0	12.3938	0	7.9314	0	18.8224	12.4065	1.1362	0	0	0	0	1093.15	1093.15	1093.36	1093.1	77.27	0.287	-1	-1	82.7	70.62	76.1
48.0996	1.2792	17.63	1.7557	6.6373	0.1987	3.5694	9.7183	2.475	6.9175	1.2668	0.0621	0.4105	48.0996	1.2792	17.63	1.7557	6.6373	0.1987	3.5694	9.7183	2.475	6.9175	1.2668	0.0621	0.4105	47.4562	0	12.4672	0	7.8596	0	18.4461	12.6219	1.1491	0	0	0	0	1091.21	1091.11	1091.19	1091.21	76.99	0.287	66.25	72.96	82.66	70.43	75.9
48.0686	1.2958	17.6893	1.7932	6.6274	0.2013	3.4886	9.6117	2.4901	7.0076	1.2833	0.0629	0.4019	48.0686	1.2958	17.6893	1.7932	6.6274	0.2013	3.4886	9.6117	2.4901	7.0076	1.2833	0.0629	0.4019	47.6319	0	12.5043	0	7.7904	0	18.0239	12.8915	1.158	0	0	0	0	1088.71	1088.61	1088.7	1088.71	76.63	0.286	65.71	72.4	82.63	70.21	75.62
48.0366	1.3128	17.7485	1.8323	6.6155	0.2039	3.408	9.5044	2.505	7.0995	1.3001	0.0637	0.3932	48.0366	1.3128	17.7485	1.8323	6.6155	0.2039	3.408	9.5044	2.505	7.0995	1.3001	0.0637	0.3932	47.7917	0	12.5424	0	7.732	0	17.6367	13.1294	1.1679	0	0	0	0	1086.13	1086.09	1086.13	1086.17	76.27	0.286	65.15	71.83	82.6	69.98	75.35
48.0032	1.3303	17.8118	1.8731	6.6002	0.2067	3.3251	9.3942	2.5203	7.1942	1.3174	0.0646	0.3844	48.0032	1.3303	17.8118	1.8731	6.6002	0.2067	3.3251	9.3942	2.5203	7.1942	1.3174	0.0646	0.3844	47.9387	0	12.569	0	7.687	0	17.283	13.3453	1.177	0	0	0	0	1083.52	1083.44	1083.56	1083.52	75.89	0.285	64.59	71.23	82.57	69.75	75.07
47.9683	1.3483	17.874	1.916	6.583	0.2095	3.2427	9.2829	2.5351	7.2915	1.3353	0.0655	0.3754	47.9683	1.3483	17.874	1.916	6.583	0.2095	3.2427	9.2829	2.5351	7.2915	1.3353	0.0655	0.3754	48.0751	0	12.6029	0	7.6476	0	16.9497	13.5366	1.1881	0	0	0	0	1080.85	1080.78	1080.85	1080.85	75.52	0.285	63.99	70.61	82.53	69.51	74.79
47.9318	1.3669	17.9377	1.961	6.563	0.2123	3.1595	9.1696	2.55	7.3917	1.3536	0.0664	0.3663	47.9318	1.3669	17.9377	1.961	6.563	0.2123	3.1595	9.1696	2.55	7.3917	1.3536	0.0664	0.3663	48.2018	0	12.6346	0	7.6164	0	16.6389	13.7086	1.1997	0	0	0	0	1078.1	1078.05	1078.08	1078.1	75.14	0.284	63.37	69.98	82.5	69.26	74.51
47.8942	1.3858	18.0044	2.0079	6.5393	0.2153	3.0751	9.0548	2.565	7.494	1.3723	0.0673	0.3571	47.8942	1.3858	18.0044	2.0079	6.5393	0.2153	3.0751	9.0548	2.565	7.494	1.3723	0.0673	0.3571	48.319	0	12.659	0	7.5948	0	16.3526	13.8636	1.2109	0	0	0	0	1075.26	1075.22	1075.29	1075.26	74.74	0.283	62.74	69.31	82.46	69.01	74.22
47.8545	1.4054	18.0716	2.0574	6.5127	0.2183	2.9902	8.9376	2.5797	7.6	1.3917	0.0682	0.3476	47.8545	1.4054	18.0716	2.0574	6.5127	0.2183	2.9902	8.9376	2.5797	7.6	1.3917	0.0682	0.3476	48.4299	0	12.6869	0	7.5778	0	16.0789	14.003	1.2234	0	0	0	0	1072.35	1072.33	1072.38	1072.35	74.33	0.283	62.08	68.63	82.43	68.75	73.93
47.8144	1.4254	18.137	2.1094	6.4825	0.2214	2.9043	8.8226	2.5936	7.7082	1.4116	0.0692	0.338	47.8144	1.4254	18.137	2.1094	6.4825	0.2214	2.9043	8.8226	2.5936	7.7082	1.4116	0.0692	0.338	48.5307	0	12.7208	0	7.5667	0	15.8249	14.1191	1.2379	0	0	0	0	1069.38	1069.28	1069.38	1069.39	73.82	0.283	61.39	67.94	82.38	68.47	73.64
47.7713	1.446	18.2067	2.1636	6.449	0.2246	2.8188	8.7027	2.6078	7.8196	1.432	0.0702	0.3281	47.7713	1.446	18.2067	2.1636	6.449	0.2246	2.8188	8.7027	2.6078	7.8196	1.432	0.0702	0.3281	48.6287	0	12.7466	0	7.5608	0	15.5816	14.2307	1.2515	0	0	0	0	1066.34	1066.25	1066.34	1066.34	73.4	0.282	60.67	67.19	82.34	68.19	73.33
47.7258	1.4673	18.2772	2.221	6.4118	0.2279	2.7329	8.5806	2.6217	7.935	1.4531	0.0712	0.318	47.7258	1.4673	18.2772	2.221	6.4118	0.2279	2.7329	8.5806	2.6217	7.935	1.4531	0.0712	0.318	48.7226	0	12.7745	0	7.5584	0	15.3473	14.3307	1.2664	0	0	0	0	1063.2	1063.15	1063.18	1063.2	72.97	0.282	59.93	66.44	82.3	67.9	73.03
47.6785	1.4891	18.3486	2.281	6.3707	0.2313	2.6472	8.4578	2.6351	8.0529	1.4747	0.0723	0.3078	47.6785	1.4891	18.3486	2.281	6.3707	0.2313	2.6472	8.4578	2.6351	8.0529	1.4747	0.0723	0.3078	48.8114	0	12.802	0	7.5604	0	15.1255	14.4188	1.2819	0	0	0	0	1059.95	1059.99	1059.95	1060	72.54	0.28	59.16	65.67	82.26	67.6	72.71
47.6298	1.5117	18.4215	2.3446	6.324	0.2348	2.5586	8.3348	2.648	8.175	1.497	0.0734	0.2972	47.6298	1.5117	18.4215	2.3446	6.324	0.2348	2.5586	8.3348	2.648	8.175	1.497	0.0734	0.2972	48.8943	0	12.83	0	7.5684	0	14.9161	14.4927	1.2984	0	0	0	0	1056.65	1056.55	1056.64	1056.65	71.99	0.281	58.36	64.85	82.21	67.29	72.4
47.5775	1.535	18.4965	2.4112	6.2737	0.2384	2.4718	8.208	2.6606	8.3007	1.5201	0.0745	0.2864	47.5775	1.535	18.4965	2.4112	6.2737	0.2384	2.4718	8.208	2.6606	8.3007	1.5201	0.0745	0.2864	48.9763	0	12.8562	0	7.5782	0	14.7113	14.5627	1.3153	0	0	0	0	1053.24	1053.18	1053.24	1053.24	71.54	0.279	57.53	64.02	82.17	66.97	72.08
47.5222	1.559	18.5731	2.4816	6.2185	0.2422	2.3847	8.079	2.6727	8.4308	1.5439	0.0757	0.2752	47.5222	1.559	18.5731	2.4816	6.2185	0.2422	2.3847	8.079	2.6727	8.4308	1.5439	0.0757	0.2752	49.0559	0	12.8831	0	7.591	0	14.5127	14.6241	1.3332	0	0	0	0	1049.72	1049.72	1049.72	1049.72	71.08	0.278	56.66	63.16	82.12	66.64	71.74
47.4649	1.5838	18.6477	2.5565	6.158	0.246	2.297	7.952	2.6834	8.5647	1.5684	0.0769	0.2637	47.4649	1.5838	18.6477	2.5565	6.158	0.246	2.297	7.952	2.6834	8.5647	1.5684	0.0769	0.2637	49.1313	0	12.9161	0	7.6057	0	14.3226	14.671	1.3532	0	0	0	0	1046.07	1046.06	1046.07	1046.12	70.51	0.278	55.75	62.27	82.07	66.29	71.42
47.4039	1.6093	18.7274	2.6344	6.0923	0.25	2.2098	7.8204	2.6941	8.7025	1.5936	0.0781	0.2518	47.4039	1.6093	18.7274	2.6344	6.0923	0.25	2.2098	7.8204	2.6941	8.7025	1.5936	0.0781	0.2518	49.2059	0	12.942	0	7.6245	0	14.1382	14.7168	1.3726	0	0	0	0	1042.39	1042.38	1042.39	1042.39	70.04	0.277	54.82	61.36	82.02	65.94	71.07
47.3399	1.6356	18.8045	2.7178	6.0209	0.2541	2.1225	7.6907	2.703	8.8452	1.6198	0.0794	0.2395	47.3399	1.6356	18.8045	2.7178	6.0209	0.2541	2.1225	7.6907	2.703	8.8452	1.6198	0.0794	0.2395	49.2781	0	12.9757	0	7.6437	0	13.9586	14.7492	1.3947	0	0	0	0	1038.54	1038.51	1038.54	1038.57	69.46	0.276	53.84	60.41	81.97	65.57	70.73
47.272	1.663	18.8839	2.806	5.9432	0.2583	2.0348	7.559	2.7109	8.993	1.6468	0.0807	0.2267	47.272	1.663	18.8839	2.806	5.9432	0.2583	2.0348	7.559	2.7109	8.993	1.6468	0.0807	0.2267	49.3492	0	13.0085	0	7.6655	0	13.7837	14.7756	1.4176	0	0	0	0	1034.6	1034.48	1034.58	1034.6	68.88	0.276	52.82	59.43	81.91	65.18	70.39
47.1995	1.6911	18.9663	2.8985	5.8598	0.2627	1.9491	7.4238	2.7182	9.1451	1.6747	0.0821	0.2134	47.1995	1.6911	18.9663	2.8985	5.8598	0.2627	1.9491	7.4238	2.7182	9.1451	1.6747	0.0821	0.2134	49.4206	0	13.0382	0	7.6888	0	13.6118	14.8	1.4406	0	0	0	0	1030.52	1030.5	1030.55	1030.52	68.41	0.274	51.78	58.44	81.86	64.78	70.03
47.123	1.7202	19.0469	2.9974	5.7697	0.2672	1.8631	7.2907	2.7233	9.3026	1.7035	0.0835	0.1994	47.123	1.7202	19.0469	2.9974	5.7697	0.2672	1.8631	7.2907	2.7233	9.3026	1.7035	0.0835	0.1994	49.4905	0	13.0737	0	7.7125	0	13.4442	14.8128	1.4662	0	0	0	0	1026.31	1026.26	1026.36	1026.31	67.83	0.273	50.68	57.42	81.8	64.36	69.68
47.0408	1.7504	19.1255	3.1029	5.6741	0.2719	1.7792	7.1579	2.726	9.4657	1.7334	0.085	0.1846	47.0408	1.7504	19.1255	3.1029	5.6741	0.2719	1.7792	7.1579	2.726	9.4657	1.7334	0.085	0.1846	49.5615	0	13.1144	0	7.7343	0	13.2776	14.818	1.4942	0	0	0	0	1021.98	1021.98	1021.98	1022.03	67.26	0.272	49.53	56.38	81.74	63.92	69.32
46.9534	1.7818	19.209	3.2149	5.5693	0.2768	1.6942	7.0223	2.7277	9.6356	1.7645	0.0865	0.1688	46.9534	1.7818	19.209	3.2149	5.5693	0.2768	1.6942	7.0223	2.7277	9.6356	1.7645	0.0865	0.1688	49.6322	0	13.1513	0	7.7598	0	13.115	14.8193	1.5226	0	0	0	0	1017.49	1017.44	1017.51	1017.49	66.7	0.271	48.35	55.3	81.68	63.46	68.96
46.8598	1.8142	19.2895	3.3341	5.4591	0.2818	1.6122	6.8886	2.7263	9.8106	1.7966	0.0881	0.1519	46.8598	1.8142	19.2895	3.3341	5.4591	0.2818	1.6122	6.8886	2.7263	9.8106	1.7966	0.0881	0.1519	49.7041	0	13.1934	0	7.7824	0	12.9538	14.8128	1.5535	0	0	0	0	1012.88	1012.87	1012.88	1012.88	66.15	0.269	47.12	54.22	81.62	62.98	68.6
46.7607	1.8477	19.3694	3.4619	5.3401	0.287	1.5301	6.7576	2.7221	9.9919	1.8298	0.0897	0.1335	46.7607	1.8477	19.3694	3.4619	5.3401	0.287	1.5301	6.7576	2.7221	9.9919	1.8298	0.0897	0.1335	49.7759	0	13.2381	0	7.8053	0	12.7969	14.7973	1.5865	0	0	0	0	1008.08	1007.94	1008.11	1008.08	65.51	0.269	45.85	53.11	81.55	62.48	68.24
46.6529	1.8826	19.4501	3.5984	5.2144	0.2924	1.4512	6.6244	2.715	10.1808	1.8643	0.0914	0.113	46.6529	1.8826	19.4501	3.5984	5.2144	0.2924	1.4512	6.6244	2.715	10.1808	1.8643	0.0914	0.113	49.8511	0	13.2844	0	7.8258	0	12.6385	14.7787	1.6214	0	0	0	0	1003.14	1003.09	1003.14	1003.14	65	0.267	44.53	52	81.48	61.96	67.88
46.5385	1.9188	19.5286	3.7454	5.08	0.2981	1.3731	6.4955	2.7039	10.3767	1.9002	0.0931	0.0892	46.5385	1.9188	19.5286	3.7454	5.08	0.2981	1.3731	6.4955	2.7039	10.3767	1.9002	0.0931	0.0892	49.9274	0	13.3349	0	7.8445	0	12.4833	14.7508	1.6591	0	0	0	0	997.993	997.895	998.013	997.993	64.42	0.266	43.17	50.88	81.41	61.41	67.53
46.4166	1.9565	19.6056	3.9034	4.9385	0.3039	1.298	6.3693	2.6886	10.5801	1.9375	0.095	0.0596	46.4166	1.9565	19.6056	3.9034	4.9385	0.3039	1.298	6.3693	2.6886	10.5801	1.9375	0.095	0.0596	50.0065	0	13.389	0	7.8597	0	12.329	14.7163	1.6995	0	0	0	0	992.691	992.589	992.691	992.697	63.88	0.265	41.77	49.76	81.33	60.83	67.18
46.2674	1.9956	19.6764	4.0756	4.784	0.31	1.2239	6.2409	2.6676	10.7919	1.9763	0.0969	0.0585	46.2674	1.9956	19.6764	4.0756	4.784	0.31	1.2239	6.2409	2.6676	10.7919	1.9763	0.0969	0.0585	50.0903	0	13.4465	0	7.8721	0	12.1728	14.6754	1.7431	0	0	0	0	987.077	987.054	987.077	987.107	63.39	0.263	40.31	48.64	81.26	60.22	66.83
[truncated: 18 more columns]
