# Supplementary material for: Constraining the volatile evolution of mafic melts at Mt. Somma–Vesuvius, Italy, based on the composition of reheated melt inclusions and their olivine hosts
Source: Copernicus journal article supplement (doi:10.5194/ejm-35-921-2023), 2023-11-09
Supplement: Supplementary file [file ejm-35-921-2023-supplement-title-page.pdf › ejm-35-921-2023-supplement-title-page.pdf]

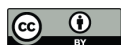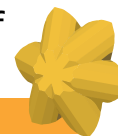

*Supplement of*

**Constraining the volatile evolution of mafic melts at  
Mt. Somma–Vesuvius, Italy, based on the composition  
of reheated melt inclusions and their olivine hosts**

**Rosario Esposito et al.**

*Correspondence to:* Rosario Esposito ([rosario.esposito@unimib.it](mailto:rosario.esposito@unimib.it))

- [ejm-35-921-2023-supplement-title-page.pdf](#)
- [Supplementary\\_Figures\\_18Sept2023.pdf](#)
- [Supplementary\\_Tablesheaders\\_rev2Sept\\_2023.pdf](#)
- [TableS1.xlsx](#)
- [TableS2.xlsx](#)
- [TableS3.xls](#)
- [TableS4.xlsx](#)
- [TableS5.xlsx](#)
- [TableS6.xlsx](#)

The copyright of individual parts of the supplement might differ from the article licence.
